# Supplementary material for: First enantioselective organocatalytic allylation of simple aldimines with allyltrichlorosilane
Source: Royal Society of Chemistry journal article supplement (doi:10.1039/b611823b), 2006-01-01
Supplement: b611823b.pdf [file b611823b.pdf]

## Supplementary Information

### First enantioselective organocatalytic allylation of simple aldimines with allyltrichlorosilane

Sunil B. Jagtap and Svetlana B. Tsogoeva\*

Institut für Organische und Biomolekulare Chemie der Georg-August-Universität

Göttingen, Tammannstrasse 2, 37077 Göttingen, Germany

stsogoe@gwdg.de

**General:** All solvents were purified by standard procedures and distilled prior to use. Reagents obtained from commercial sources were used without further purification. TLC chromatography was performed on precoated aluminium silica gel SIL G/UV<sub>254</sub> plates (Marcherey, Nagel & Co.) or silica gel 60-F<sub>254</sub> precoated glass plates (Merck). <sup>1</sup>H NMR spectra were recorded with a Varian Unity 300. ESI mass spectra were recorded with a LCQ Finnigan spectrometer. High-resolution mass spectra were measured with a Bruker APEX IV 7T FT-ICR instrument. A Perkin-Elmer 241 polarimeter was used for optical rotation measurements.

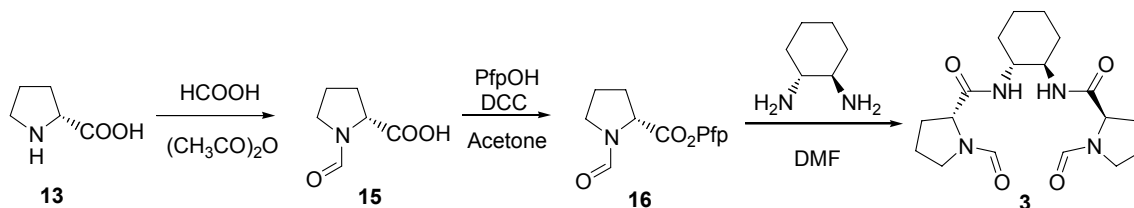

**Compound 15:** D-Proline (3 g, 26.05 mmol) was dissolved in 85% formic acid (55 mL) and cooled to 0 °C. Acetic anhydride (18 mL) was added and the mixture was stirred at room temperature for 2 h. Ice cold water (21 mL) was then added and the solvent was removed under reduced pressure. The residual pale yellow oil was dissolved in methanol and the solvent was removed under reduced pressure to give the product **15** as a white powder. Yield 3.4 g (91%).  $[\alpha]_D^{20} = +121.5^\circ$  (c = 1.2, EtOH). <sup>1</sup>H NMR (300 MHz, CDCl<sub>3</sub>):  $\delta = 1.82$ -2.28 (m, 4H), 3.49-3.69 (m, 2H), 4.39-4.48 (m, 1H), 8.23 and 8.28 (two

singlets, 1H, CHO), 10.73 (s, 1H, COOH) ppm. ESI-MS (positive ion):  $m/z = 144.0 [M + H]^+$ , 166.0  $[M + Na]^+$ , 308.8  $[2M + Na]^+$ .

**Compound 16:** The cooled solution of *N,N*-dicyclohexylcarbodiimide (DCC) (4.76 g, 23.06 mmol) in acetone (15 mL) was added dropwise to the stirred solution of **15** (3 g, 20.96 mmol) and pentafluorophenol (PfpOH) (4.25 g, 23.09 mmol) in acetone (25 mL) at 0 °C. The reaction mixture was stirred at 0 °C for 5 h. The precipitate formed (urea) was filtered off and washed with acetone (15 mL).

The urea which precipitated was removed by filtration and the solvent was subsequently removed under vacuum. The oily residue was dissolved in acetone (15 mL), cooled to 0°C and more of the urea was able to be removed by filtration. The filtrate was concentrated to dryness under reduced pressure to give the product **16** as a white solid, which was used without further purification. Yield 5.96 g (92%). <sup>1</sup>H NMR (300 MHz, CDCl<sub>3</sub>):  $\delta = 1.98-2.48$  (m, 4 H), 3.58-3.74 (m, 2 H), 4.73-4.79 (m, 1 H), 8.32 and 8.34 (two singlets, 1H, CHO) ppm.

**Bisformamide 3:** To a stirred solution of (*R,R*)-1,2-diaminocyclohexane (481 mg, 4.21 mmol) in DMF (10 mL) was added the solution of **16** (3 g, 9.70 mmol) in DMF (15 mL). The reaction mixture was stirred at room temperature for 12 h. The white precipitated product was filtered off, washed with cold ethyl acetate and dried under vacuum to give a white powder. Yield 1.23 g (80%).  $[\alpha]_D^{20} = +245.6^\circ$  ( $c = 0.73$ , CHCl<sub>3</sub>).

<sup>1</sup>H NMR (300 MHz, CDCl<sub>3</sub>):  $\delta = 1.15-1.35$  (m, 4H), 1.60-2.29 (m, 12H), 3.40-3.62 (m, 6H), 4.30-4.41 (m, 2H), 6.86-7.22 (m, 2H, 2 x NH), 8.16-8.28 (three singlets, 2H, 2 x CHO) ppm. ESI-MS (positive ion):  $m/z = 365.2 [M + H]^+$ , 387.3  $[M + Na]^+$ , 751.0  $[2M + Na]^+$ . ESI-MS (negative ion):  $m/z = 363.3 [M - H]^-$ . HRMS (ESI): calcd. for C<sub>18</sub>H<sub>28</sub>N<sub>4</sub>O<sub>4</sub>  $[M + H]^+$  365.21833, found 365.21860. Anal. Calcd. for C<sub>18</sub>H<sub>28</sub>N<sub>4</sub>O<sub>4</sub>: C, 59.32; H, 7.74; N, 15.37, found C, 59.01; H, 7.95; N, 15.21.

**General procedure for the allylation of simple aldimines with allyltrichlorosilane:**

To a solution of aldimine (0.0825 mmol), bisformamide **3** (0.165 mmol, 2 equiv) and L-proline (0.165 mmol, 2 equiv) in CH<sub>2</sub>Cl<sub>2</sub> (0.165 mL) was added allyltrichlorosilane

(0.124 mmol, 1.5 equiv). After stirring vigorously at room temperature for 4 hours, triethylamine (0.06 mL) in methanol (0.3 mL) was added to quench the reaction. The mixture was diluted with diethyl ether (11 mL) and water (5 mL). The organic layer was separated, washed twice with water (5 mL), dried over anhydrous Na<sub>2</sub>SO<sub>4</sub>, filtered, and purified by column chromatography (hexane/ethyl acetate) to give the product.

<sup>1</sup>H NMR (300 MHz, CDCl<sub>3</sub>):

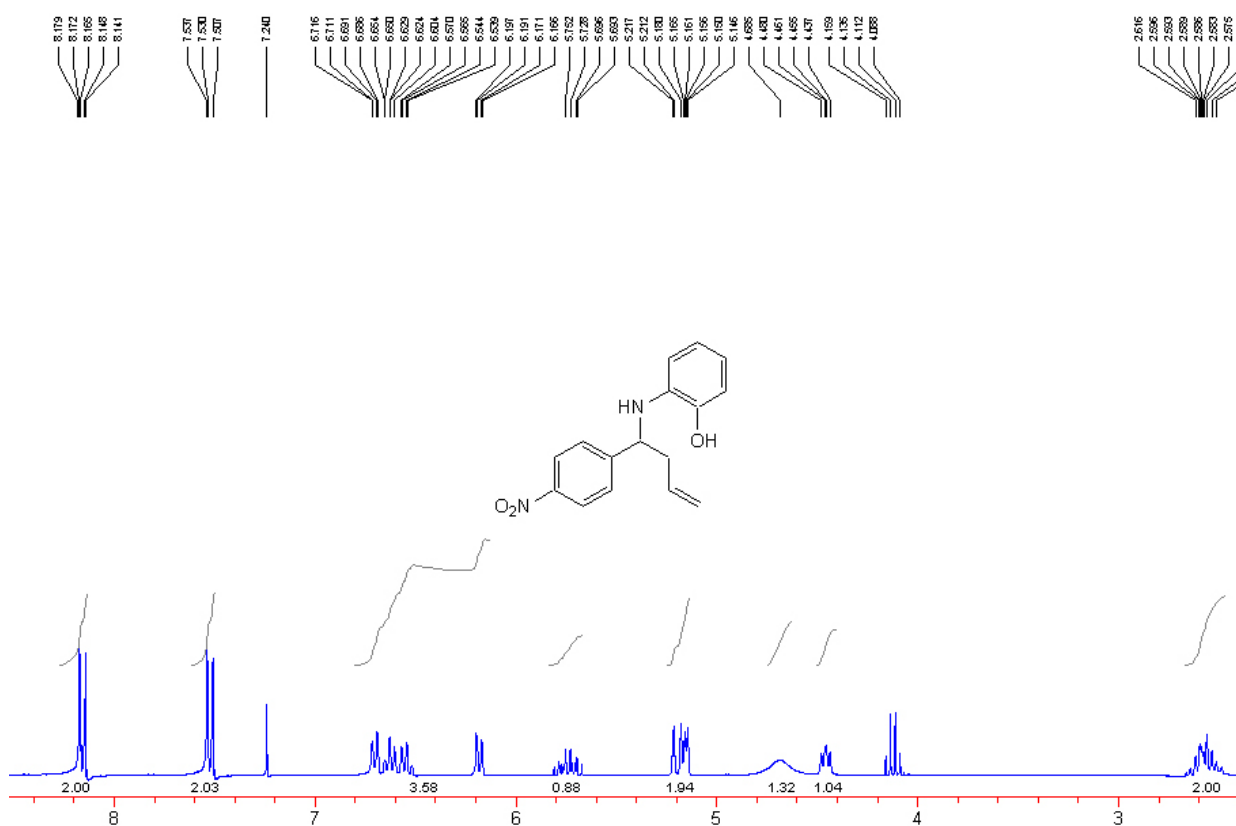

ESI-MS (positive ion):  $m/z = 307.3$  [M + Na]<sup>+</sup>.

ESI-MS (negative ion):  $m/z = 283.0$  [M - H]<sup>-</sup>.

$^1\text{H NMR}$  (300 MHz,  $\text{CDCl}_3$ ):

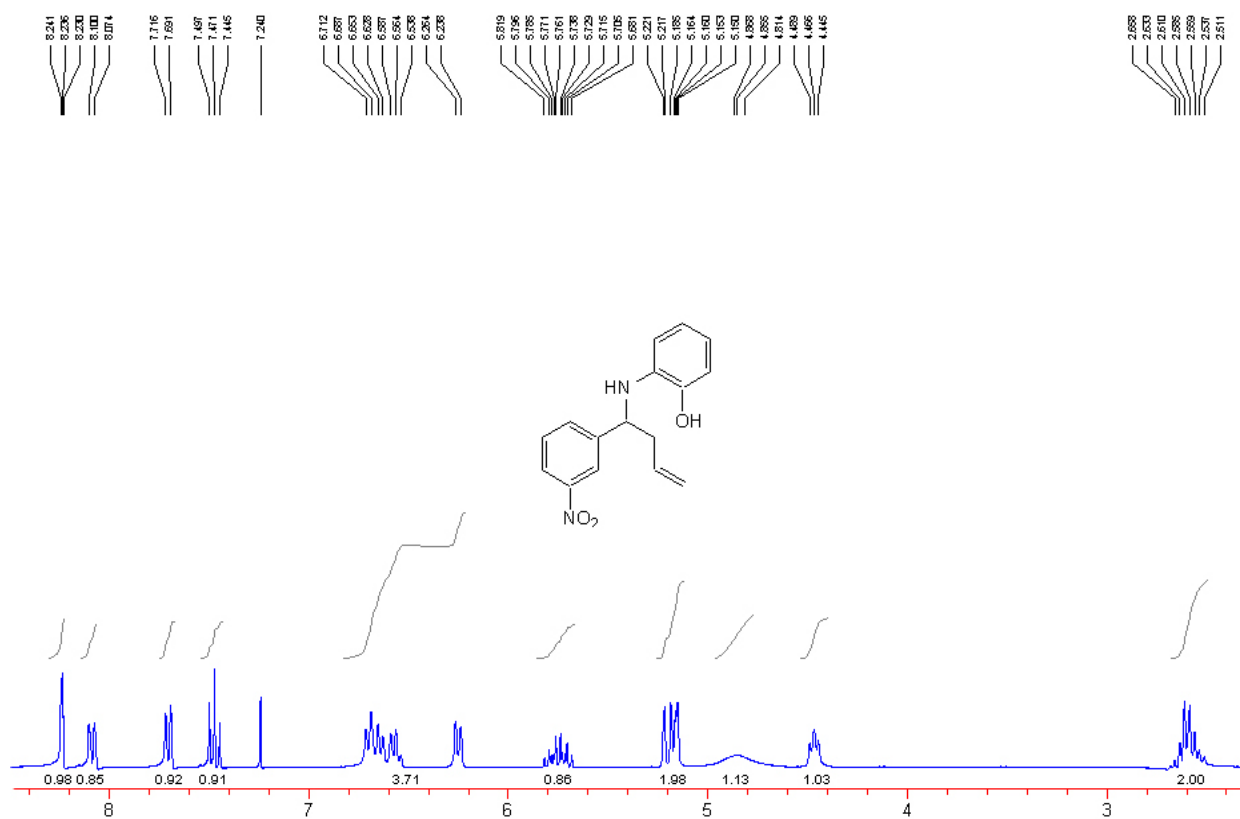

ESI-MS (negative ion):  $m/z = 283.0$   $[\text{M} - \text{H}]^-$ ,  $566.9$   $[2\text{M} - \text{H}]^-$ .

$^1\text{H}$  NMR (300 MHz,  $\text{CDCl}_3$ ):

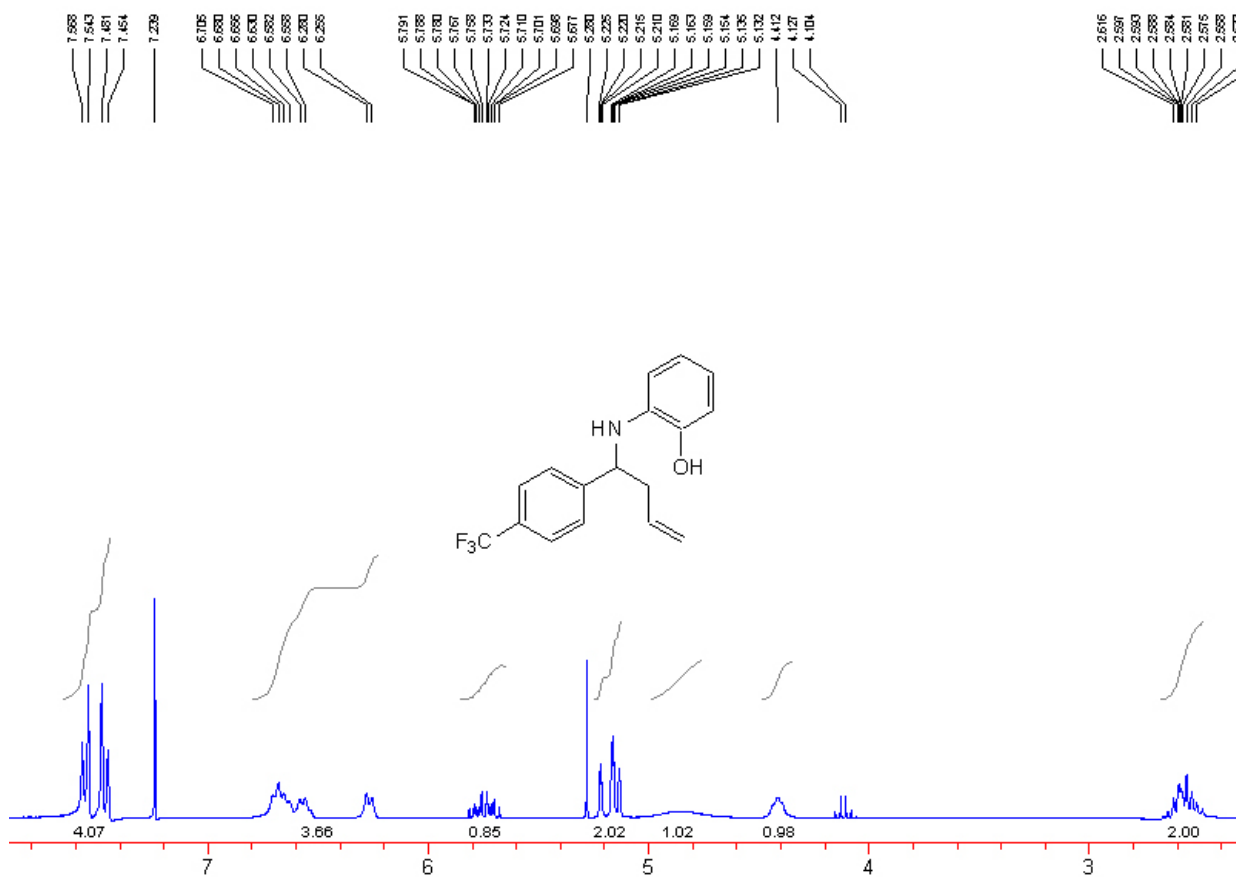

ESI-MS (negative ion):  $m/z = 306.1$   $[\text{M} - \text{H}]^-$ ,  $612.9$   $[2\text{M} - \text{H}]^-$ .

$^1\text{H}$  NMR (300 MHz,  $\text{CDCl}_3$ ):

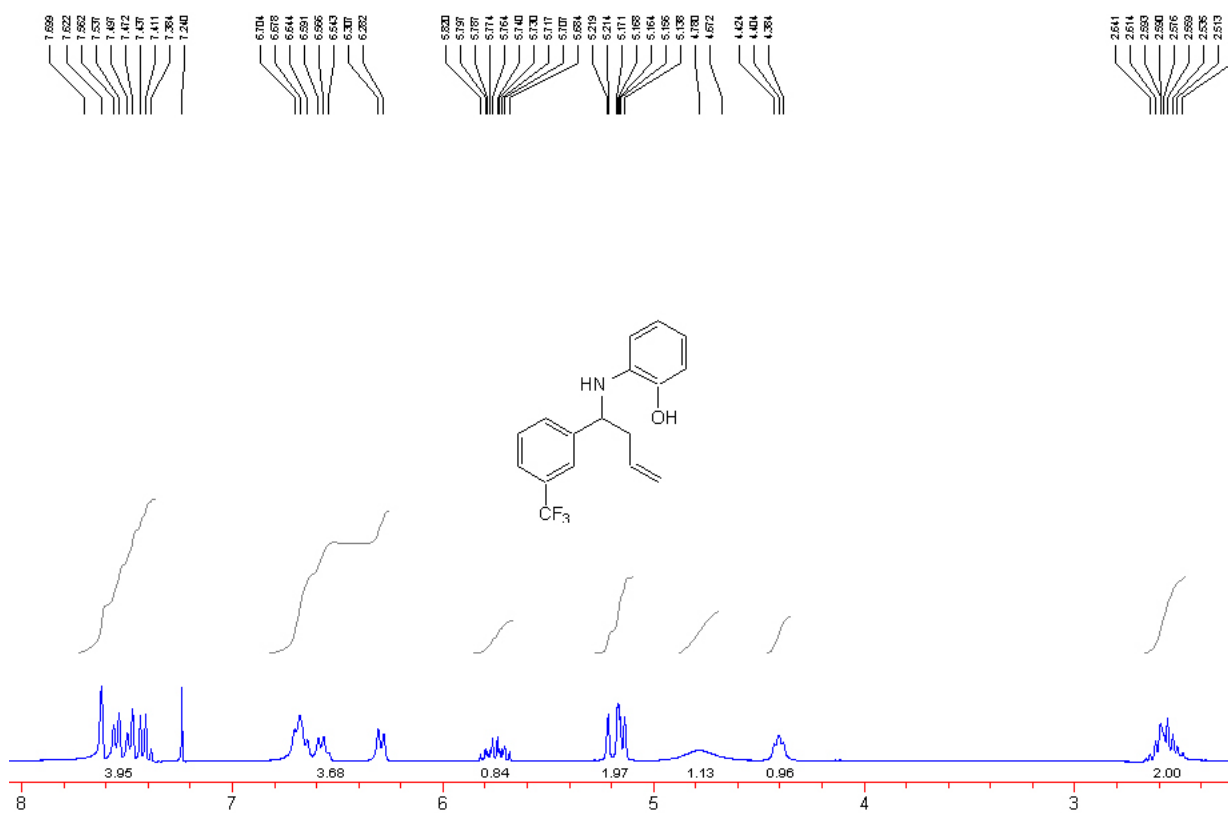

ESI-MS (negative ion):  $m/z = 306.1$   $[\text{M} - \text{H}]^-$ ,  $612.9$   $[2\text{M} - \text{H}]^-$ .

$^1\text{H}$  NMR (300 MHz,  $\text{CDCl}_3$ ):

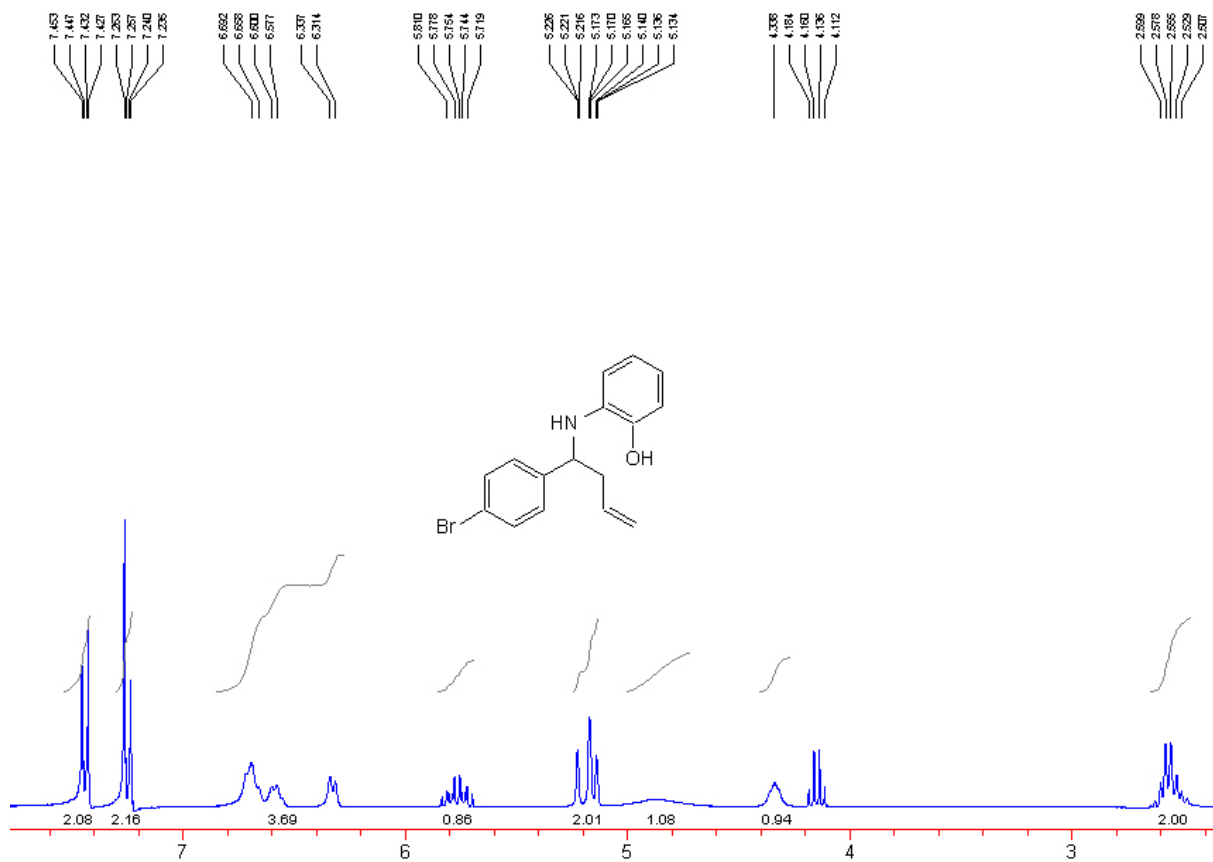

ESI-MS (negative ion):  $m/z = 316.0$  [ $\text{M} - \text{H}$ ],  $634.7$  [ $2\text{M} - \text{H}$ ].

$^1\text{H}$  NMR (300 MHz,  $\text{CDCl}_3$ ):

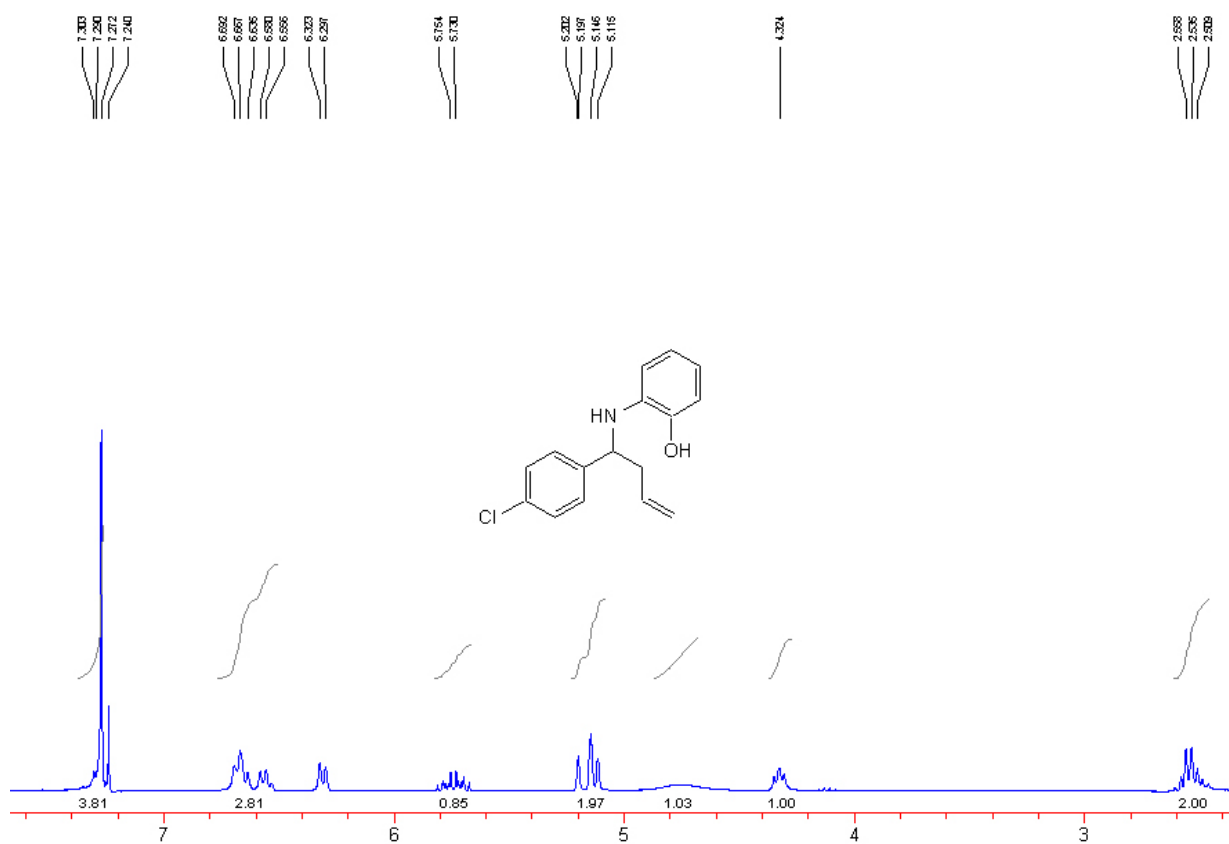

ESI-MS (negative ion):  $m/z = 272.0$   $[\text{M} - \text{H}]^-$ ,  $544.9$   $[2\text{M} - \text{H}]^-$ .



$^1\text{H}$  NMR (300 MHz,  $\text{CDCl}_3$ ):

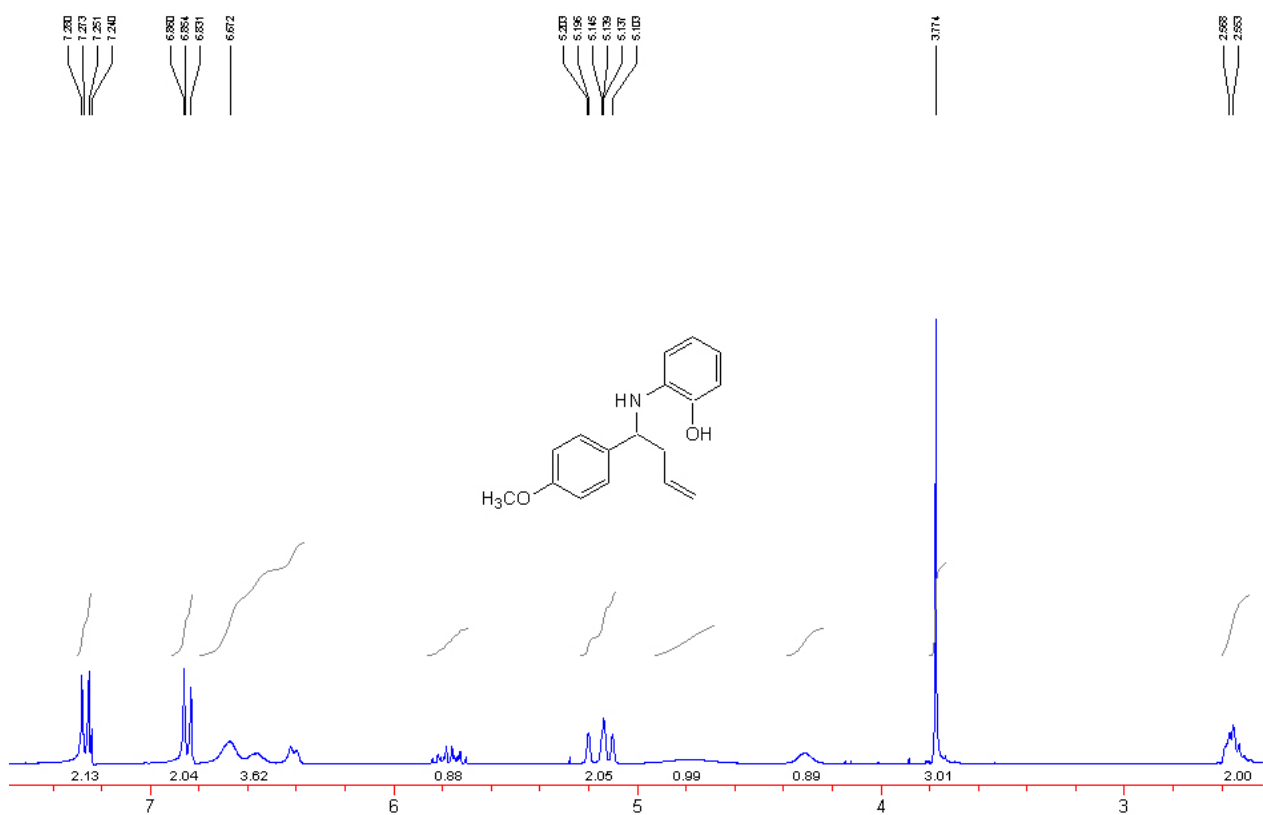

ESI-MS (positive ion):  $m/z = 269.8$   $[\text{M} + \text{H}]^+$ ,  $291.9$   $[\text{M} + \text{Na}]^+$ .

ESI-MS (negative ion):  $m/z = 268.1$   $[\text{M} - \text{H}]^-$ .

$^1\text{H}$  NMR (300 MHz,  $\text{CDCl}_3$ ):

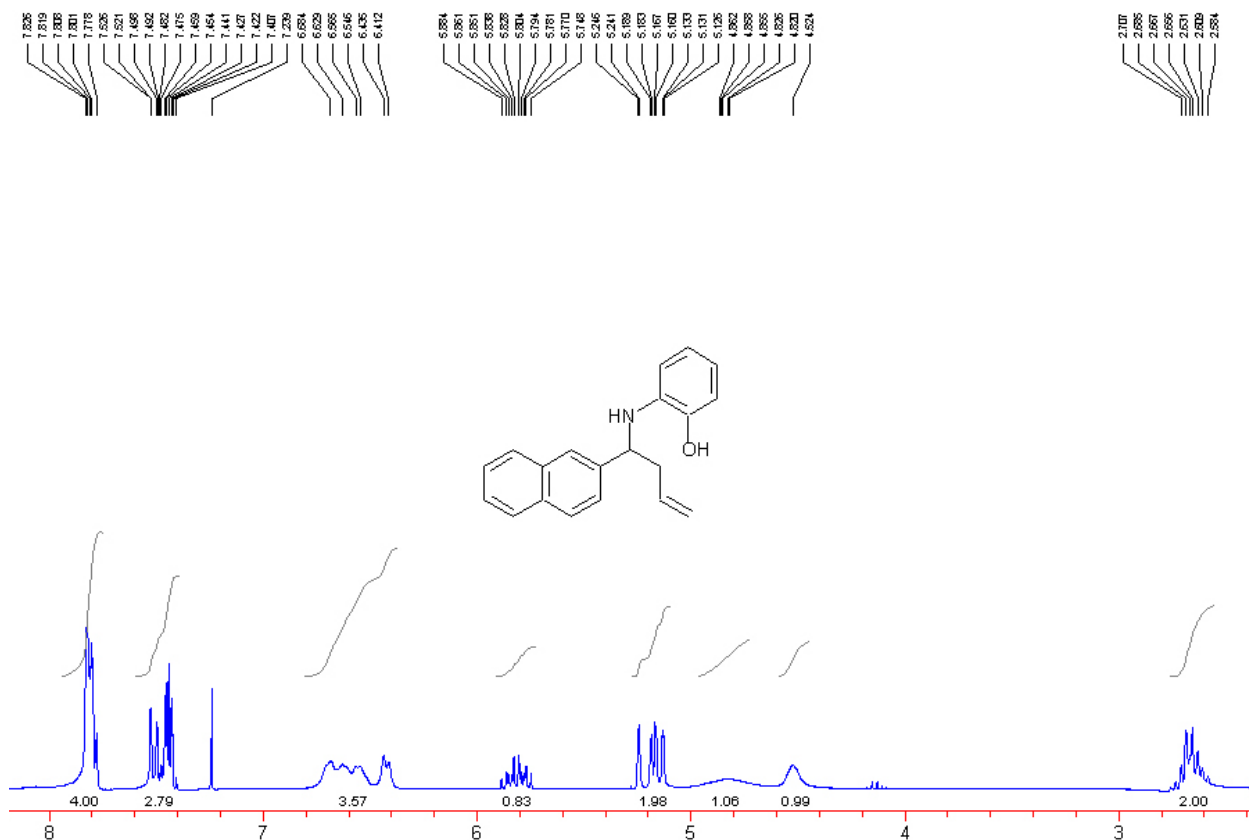

ESI-MS (positive ion):  $m/z = 289.8$   $[\text{M} + \text{H}]^+$ .

ESI-MS (negative ion):  $m/z = 288.1$   $[\text{M} - \text{H}]^-$ .

$^1\text{H}$  NMR (300 MHz,  $\text{CDCl}_3$ ):

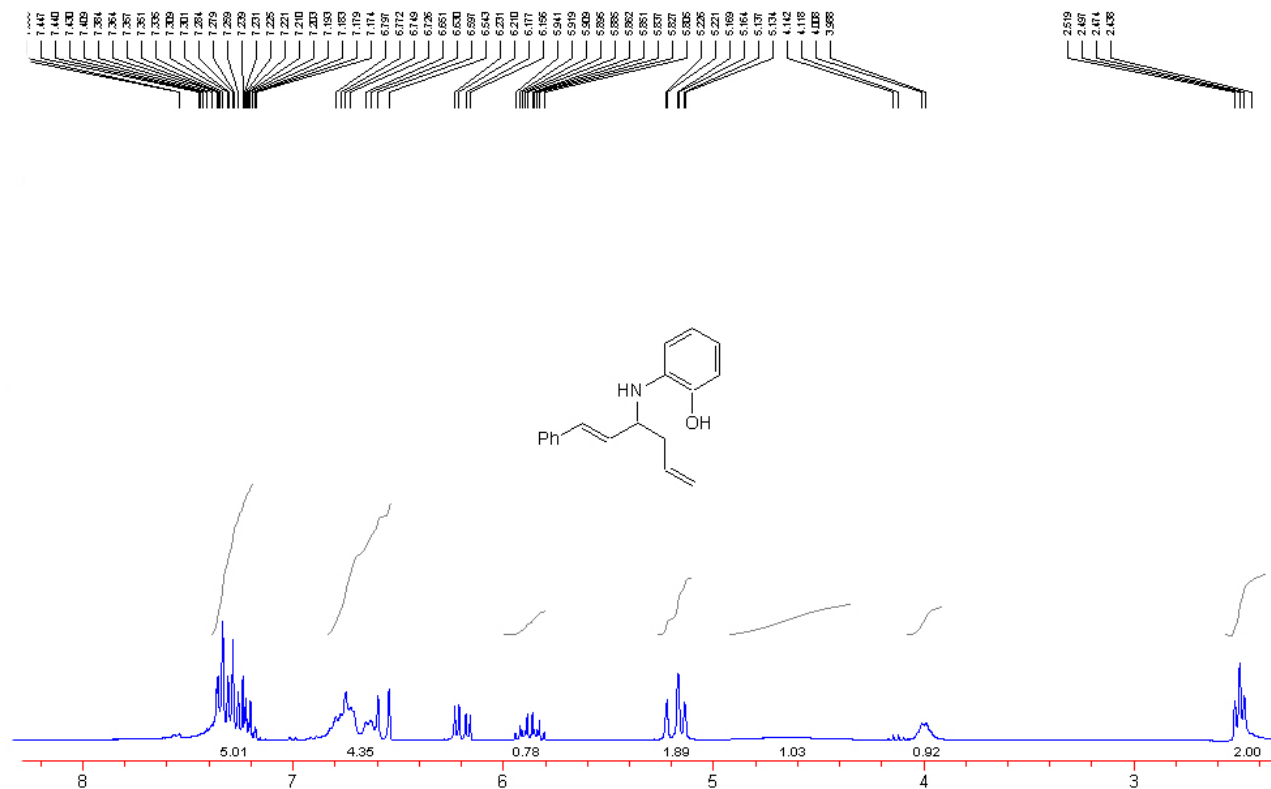

ESI-MS (negative ion):  $m/z = 264.0$  [ $\text{M} - \text{H}$ ],  $529.0$  [ $2\text{M} - \text{H}$ ].

$^1\text{H}$  NMR (300 MHz,  $\text{CDCl}_3$ ):

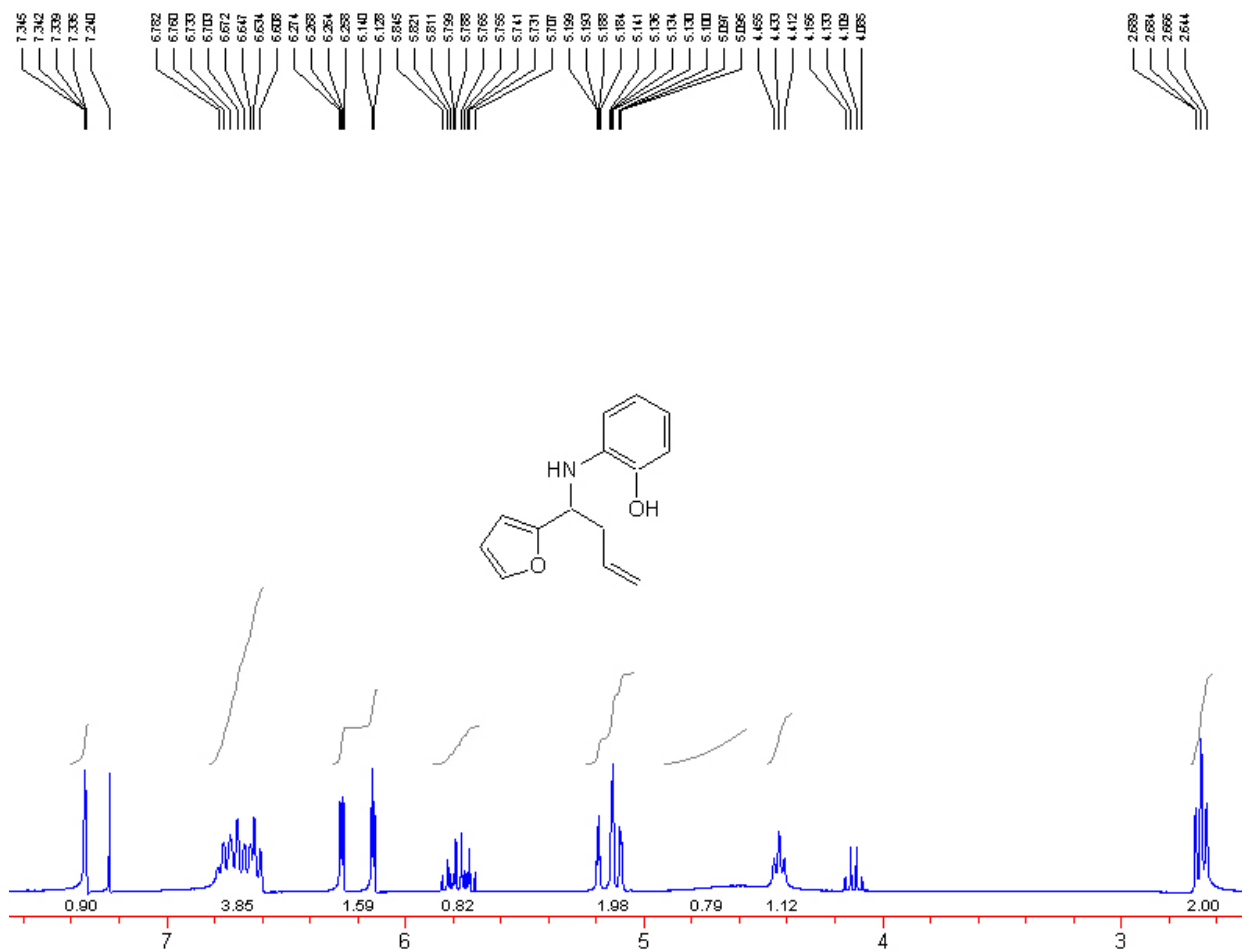

ESI-MS (negative ion):  $m/z = 228.0$   $[\text{M} - \text{H}]^-$ ,  $456.7$   $[2\text{M} - \text{H}]^-$ .

$^1\text{H}$  NMR (300 MHz,  $\text{CDCl}_3$ ):

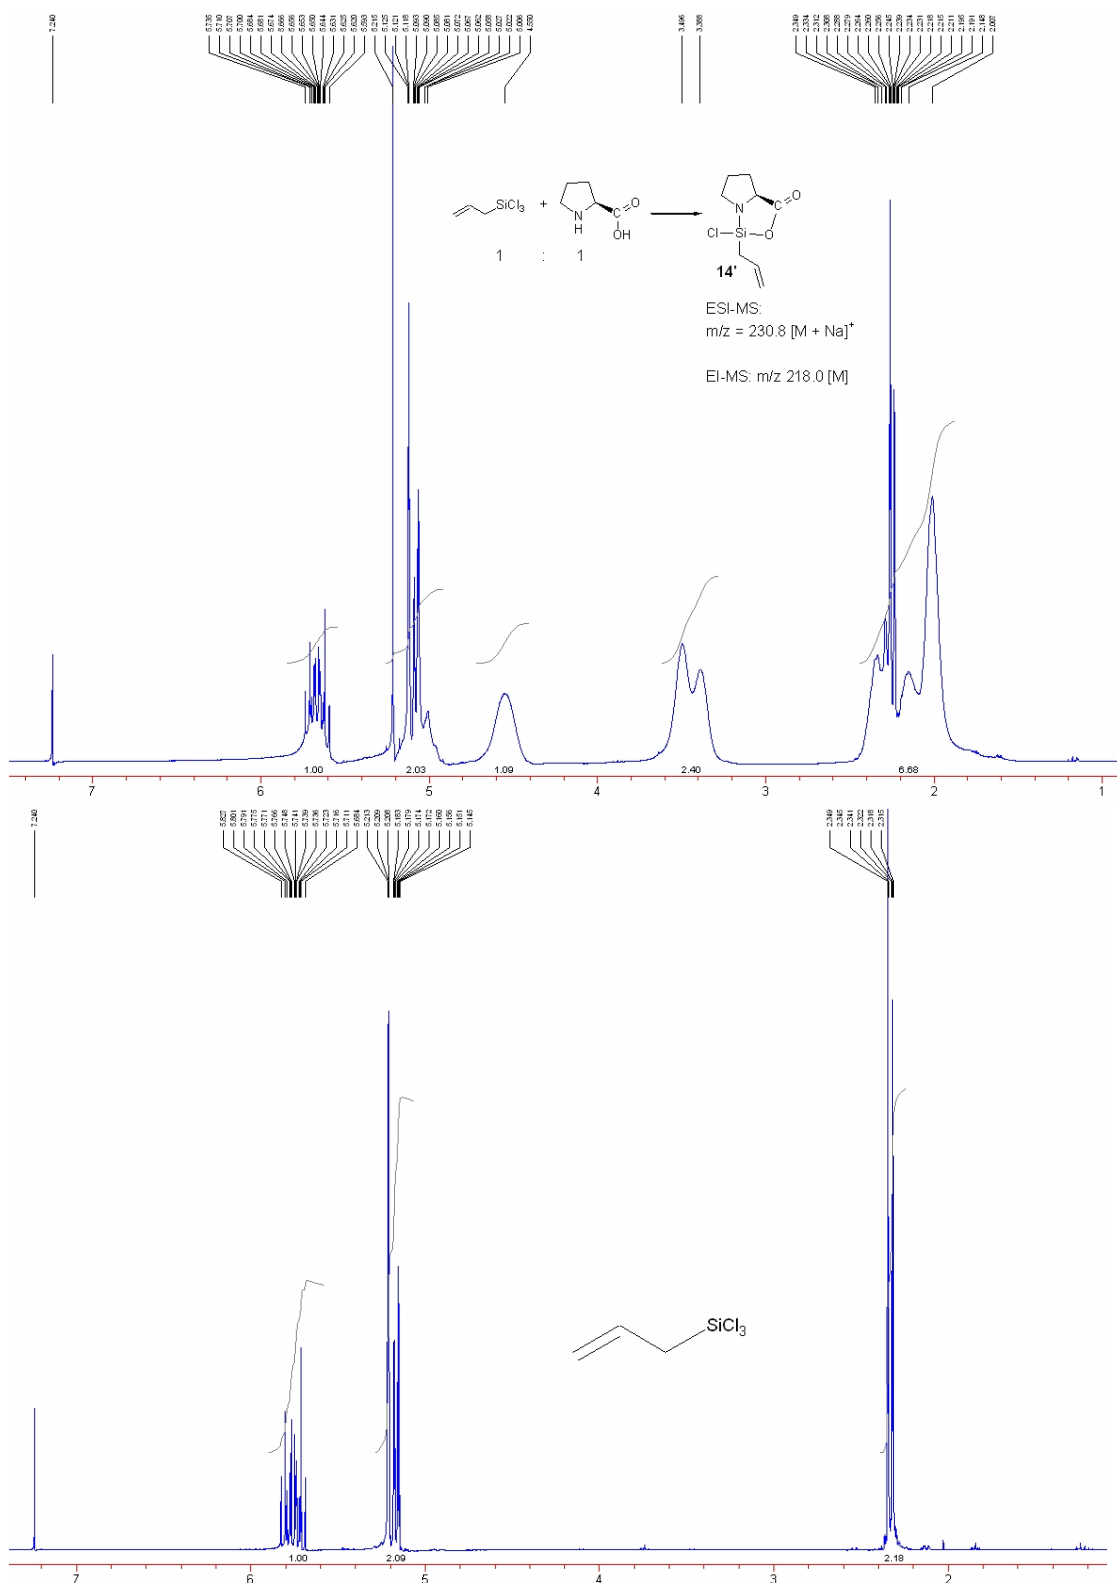

n-Hexane/ 2-Propanol = 90:10, flow rate 1 ml/ min,  $\lambda = 210$  nm (Daicel Chiralpak AD column)

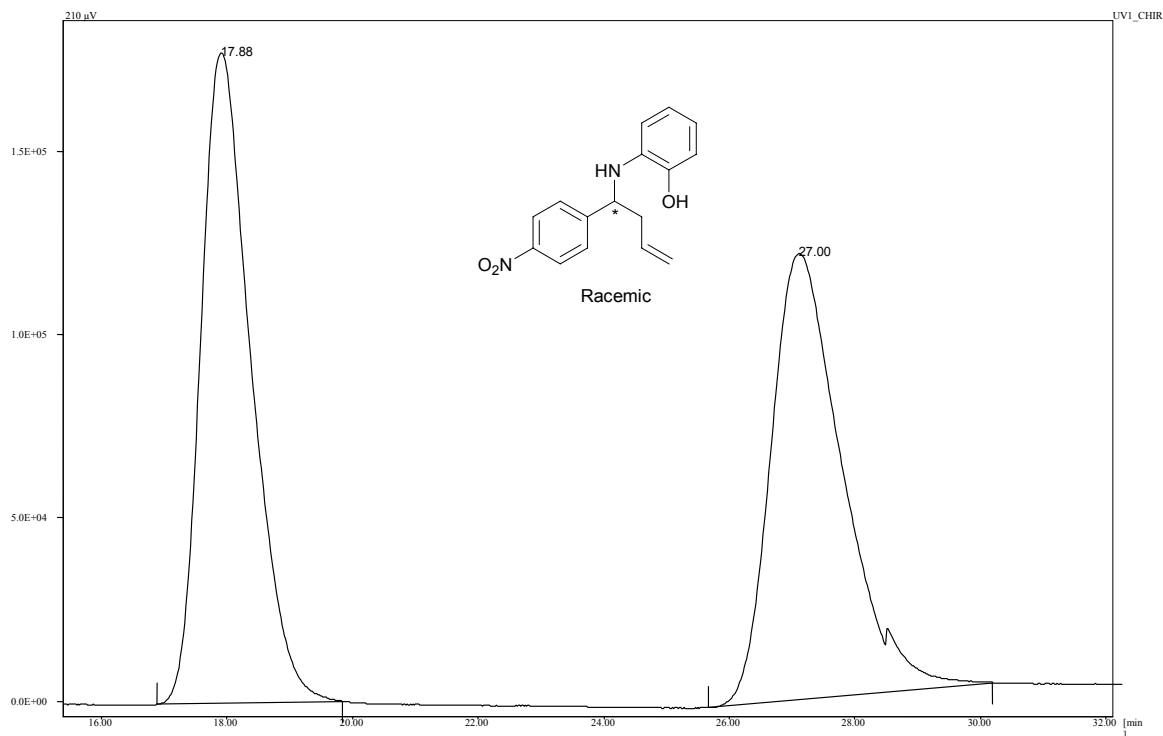

File name : RANO2001  
Control Method : 90-10-1M

| # | Name   | Rt    | Area        | %Area  |
|---|--------|-------|-------------|--------|
| 1 | Peak 1 | 17,88 | 9590732,000 | 50,456 |
| 2 | Peak 2 | 27,00 | 9417262,250 | 49,544 |

Total Area of Peak = 19007994.25

n-Hexane/ 2-Propanol = 90:10, flow rate 1 ml/ min,  $\lambda = 210$  nm (Daicel Chiralpak AD column)

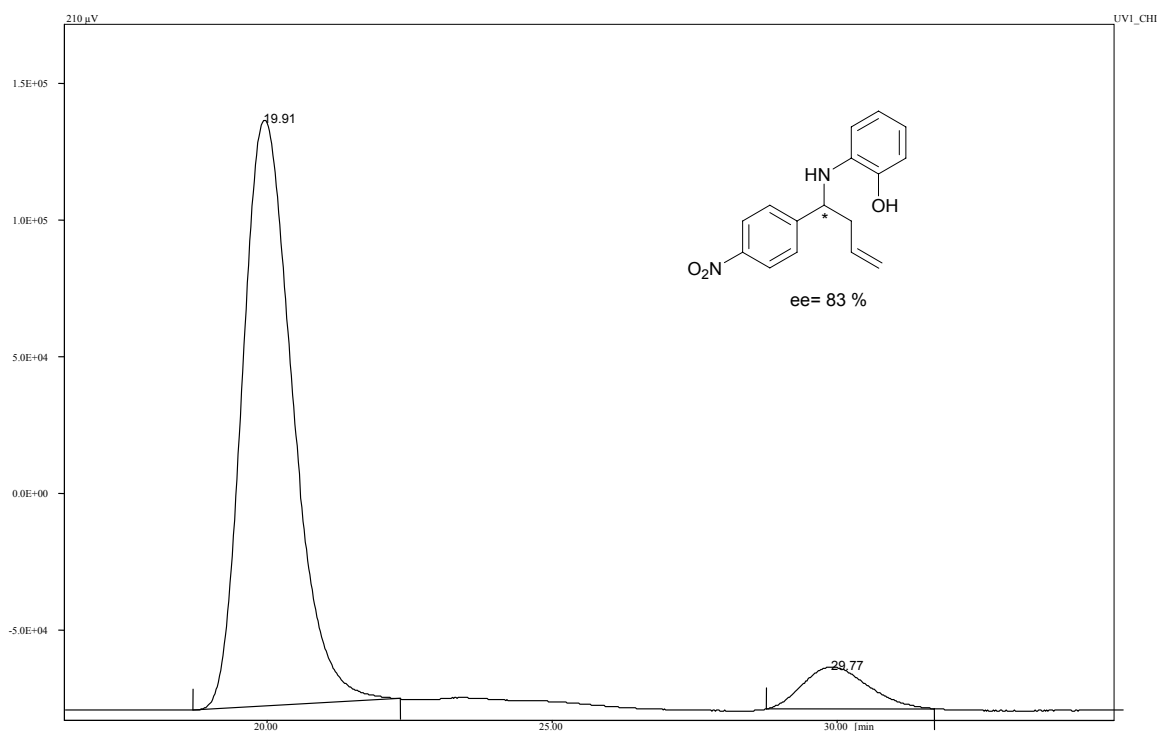

File name : S390C001  
Control Method : 90-10-1M

| # | Name   | Rt    | Area         | %Area  |
|---|--------|-------|--------------|--------|
| 1 | Peak 1 | 19,91 | 12855646,001 | 91,449 |
| 2 | Peak 2 | 29,77 | 1202149,749  | 8,551  |

Total Area of Peak = 14057795.75

n-Hexane/ 2-Propanol = 90:10, flow rate 1 ml/ min,  $\lambda = 210$  nm (Daicel Chiralpak OD column)

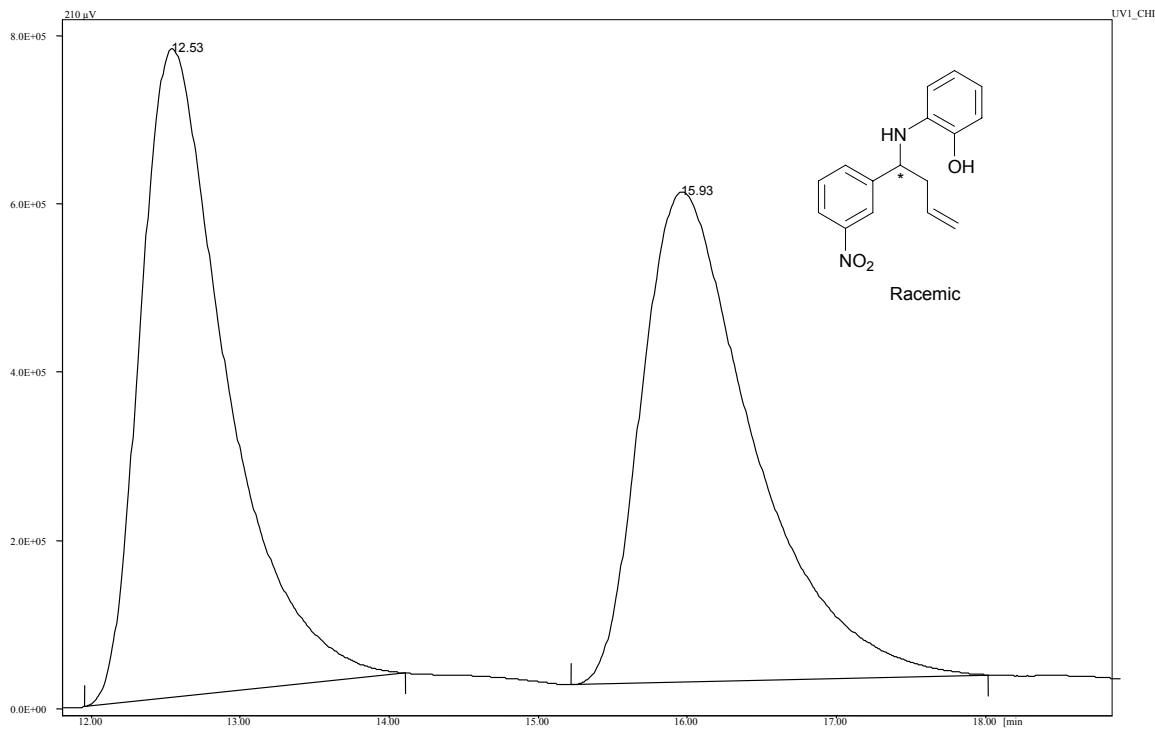

File name : SJ417001  
Control Method : 90-10-1M

| # | Name   | Rt    | Area         | %Area  |
|---|--------|-------|--------------|--------|
| 1 | Peak 1 | 12,53 | 30937820,000 | 50,550 |
| 2 | Peak 2 | 15,93 | 30264833,500 | 49,450 |

Total Area of Peak = 61202653.50



n-Hexane/ 2-Propanol = 90:10, flow rate 1 ml/ min,  $\lambda = 210$  nm (Daicel Chiralpak OD column)

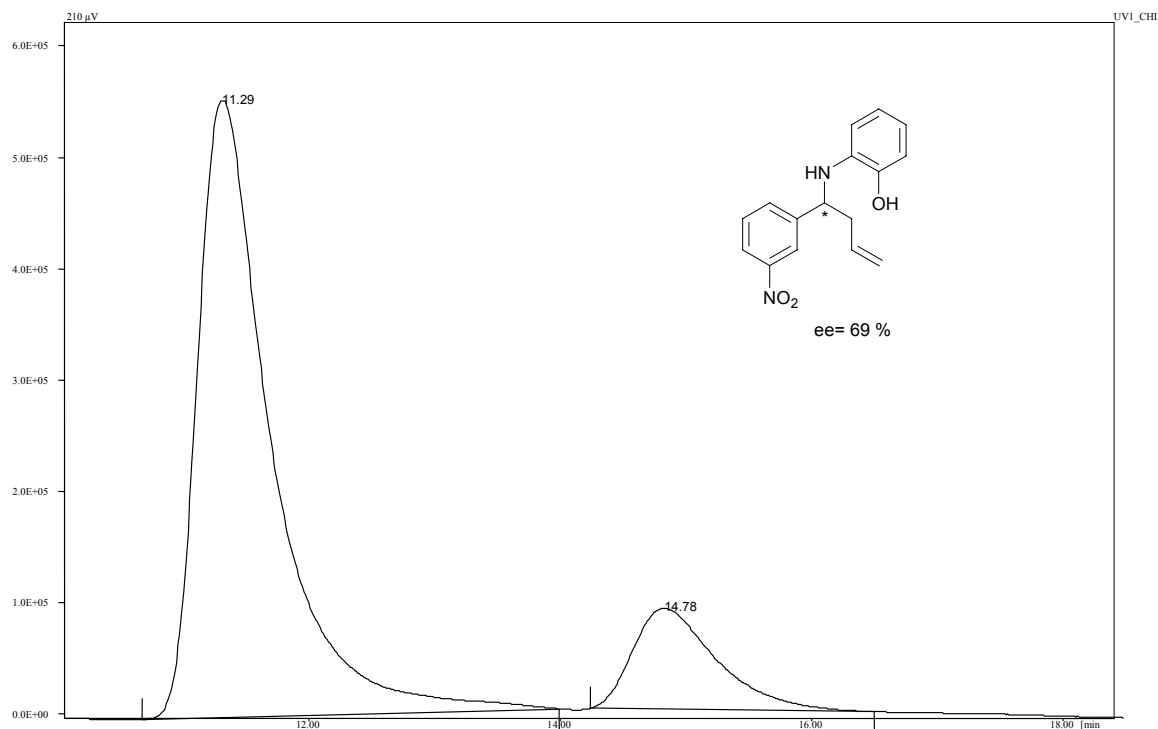

File name : SJ418001  
Control Method : 90-10-1M

| # | Name   | Rt    | Area         | %Area  |
|---|--------|-------|--------------|--------|
| 1 | Peak 1 | 11,29 | 22241340,250 | 84,414 |
| 2 | Peak 2 | 14,78 | 4106676,500  | 15,586 |

Total Area of Peak = 26348016.75

n-Hexane/ 2-Propanol = 90:10, flow rate 0.5 ml/ min,  $\lambda = 210$  nm (Daicel Chiralpak OD column)

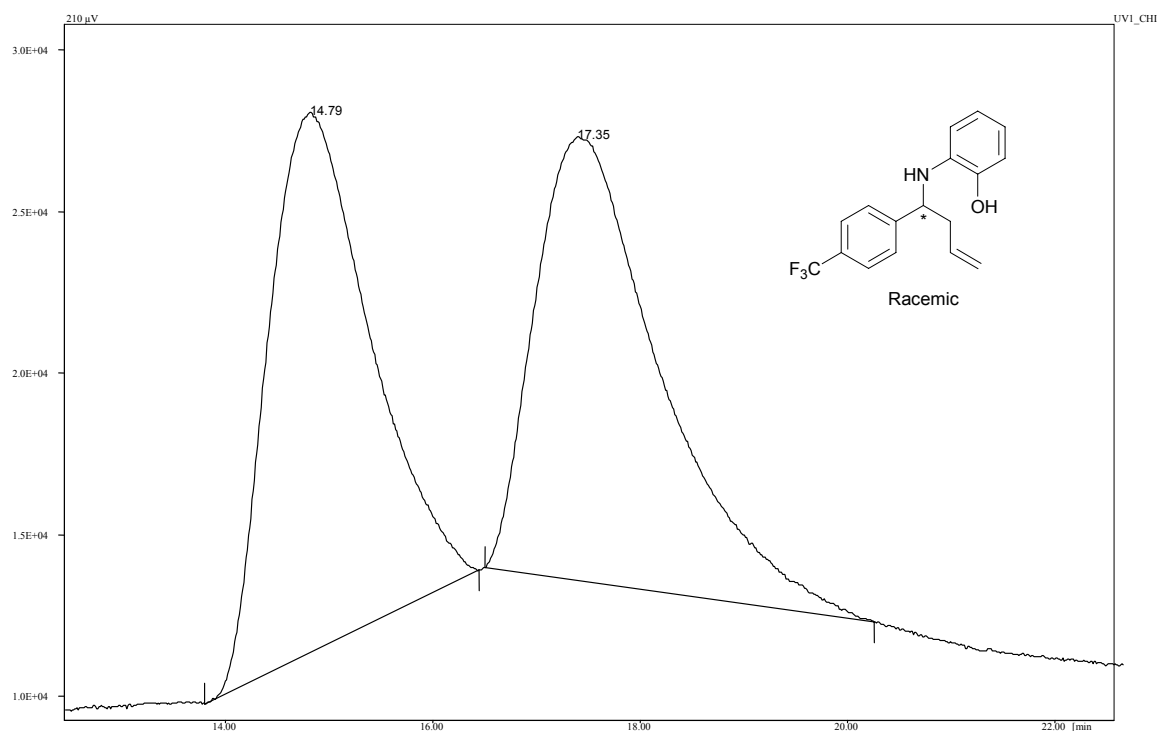

File name : SJ404002  
Control Method :90-10-05

| # | Name   | Rt    | Area        | %Area  |
|---|--------|-------|-------------|--------|
| 1 | Peak 1 | 14,79 | 1125885,500 | 49,622 |
| 2 | peak 2 | 17,35 | 1143030,000 | 50,378 |

Total Area of Peak = 2268915.50

n-Hexane/ 2-Propanol = 90:10, flow rate 0.5 ml/ min,  $\lambda = 210$  nm (Daicel Chiralpak OD column)

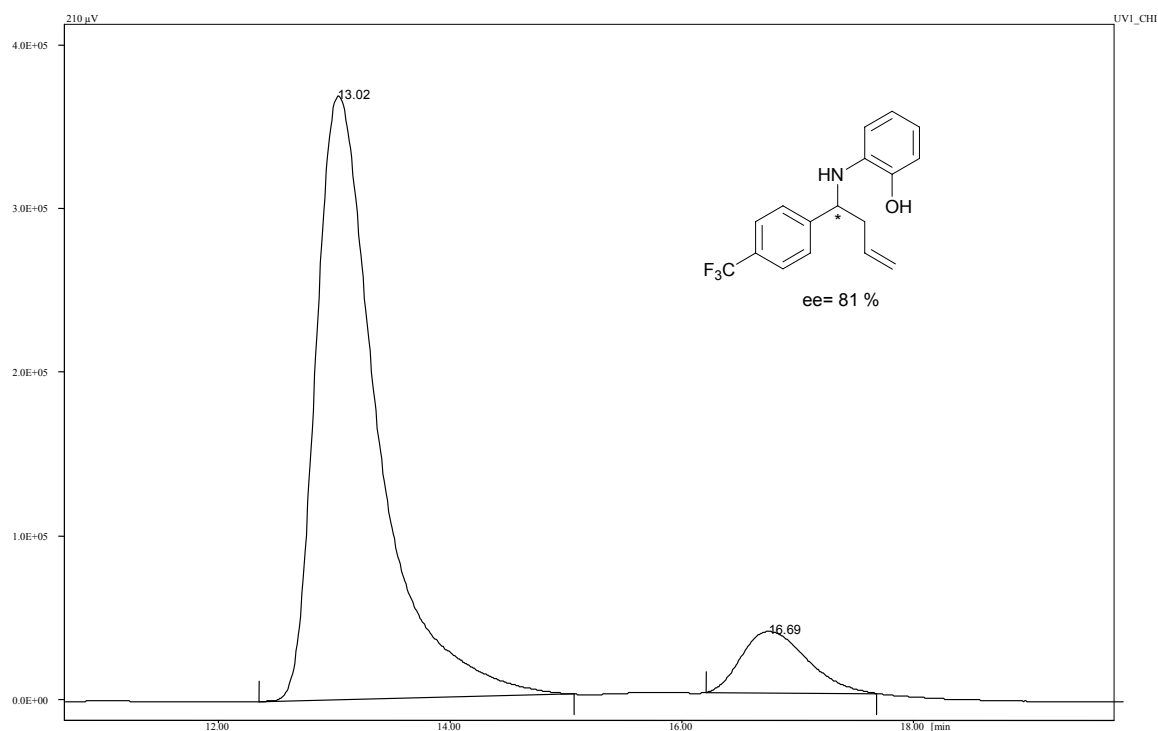

File name : SJ406002  
Control Method :90-10-05

| # | Name   | Rt    | Area         | %Area  |
|---|--------|-------|--------------|--------|
| 1 | Peak 1 | 13,02 | 13424531,000 | 90,328 |
| 2 | Peak 2 | 16,69 | 1437390,000  | 9,672  |

Total Area of Peak = 14861921.00

n-Hexane/ 2-Propanol = 95:05, flow rate 0.5 ml/ min,  $\lambda = 210$  nm (Daicel Chiralpak OD column)

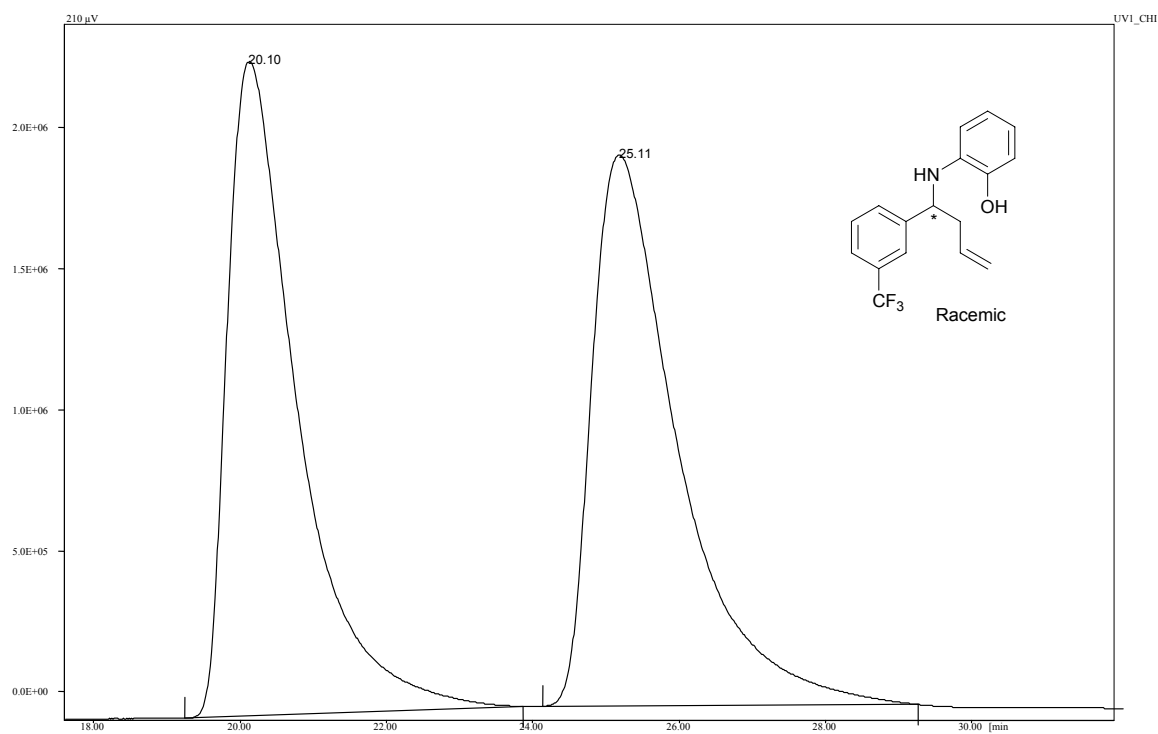

File name : SJ419001  
Control Method :95\_05\_05

| # | Name   | Rt    | Area          | %Area  |
|---|--------|-------|---------------|--------|
| 1 | Peak 1 | 20,10 | 151598371,000 | 49,188 |
| 2 | Peak 2 | 25,11 | 156603189,000 | 50,812 |

Total Area of Peak = 308201560.00

n-Hexane/ 2-Propanol = 95:05, flow rate 0.5 ml/ min,  $\lambda = 210$  nm (Daicel Chiralpak OD column)

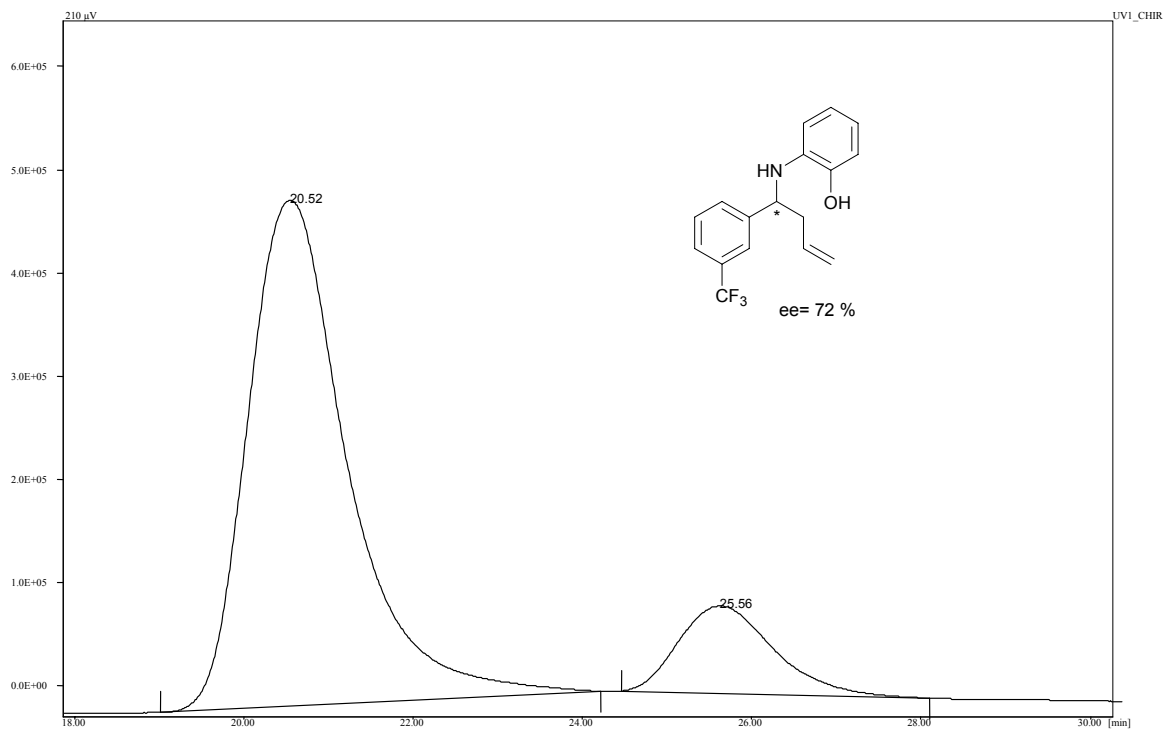

File name : SJ420001  
Control Method :95\_05\_05

| # | Name   | Rt    | Area         | %Area  |
|---|--------|-------|--------------|--------|
| 1 | Peak 1 | 20,52 | 39496601,250 | 85,871 |
| 2 | Peak 2 | 25,56 | 6498418,000  | 14,129 |

Total Area of Peak = 45995019.25

n-Hexane/ 2-Propanol = 95:05, flow rate 0.5 ml/ min,  $\lambda = 210$  nm (Daicel Chiralpak OD column)

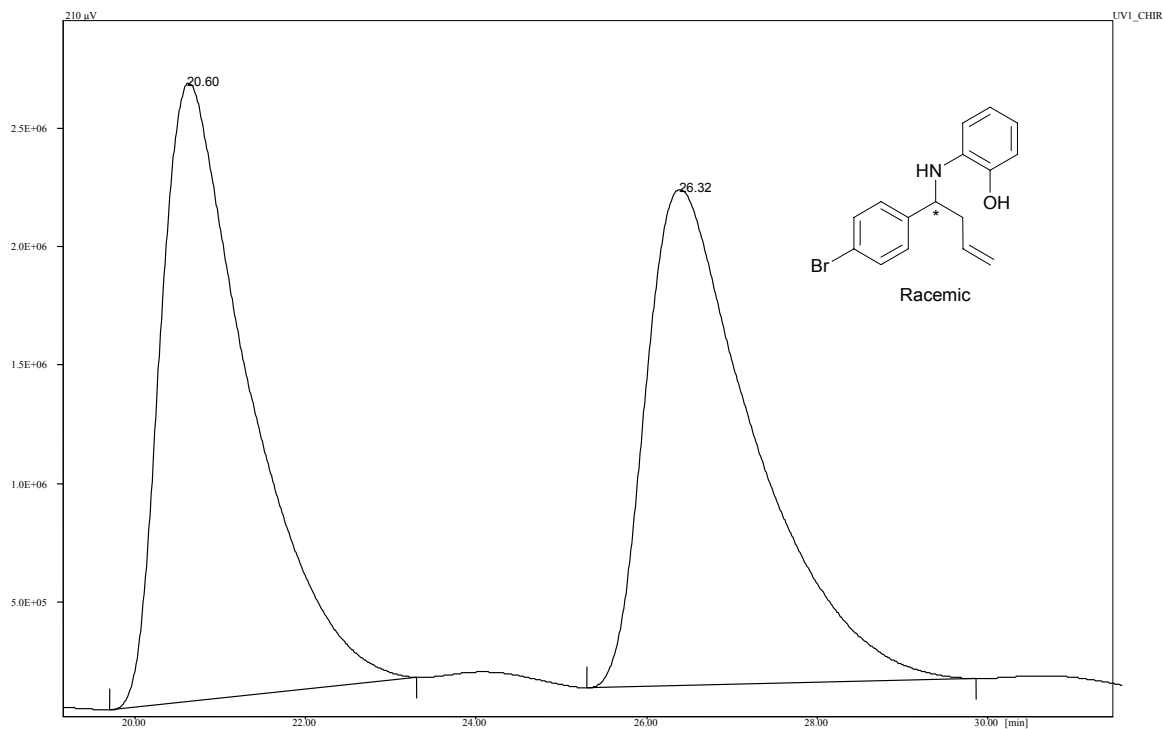

File name : SJ398002  
Control Method :95\_05\_05

| # | Name   | Rt    | Area          | %Area  |
|---|--------|-------|---------------|--------|
| 1 | Peak 1 | 20,60 | 185906406,000 | 50,384 |
| 2 | Peak 2 | 26,32 | 183074728,500 | 49,616 |

Total Area of Peak = 368981134.50

n-Hexane/ 2-Propanol = 95:05, flow rate 0.5 ml/ min,  $\lambda = 210$  nm (Daicel Chiralpak OD column)

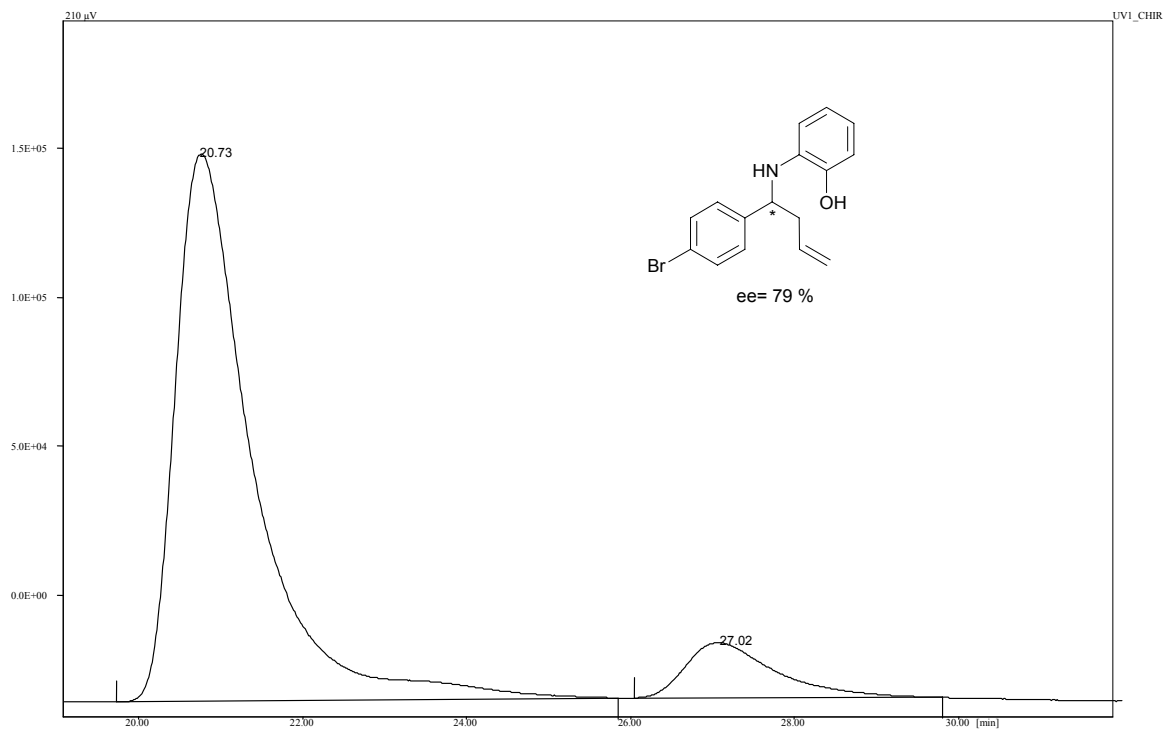

File name : SJ410001  
Control Method :95\_05\_05

| # | Name   | Rt    | Area         | %Area  |
|---|--------|-------|--------------|--------|
| 1 | Peak 1 | 20,73 | 11912952,001 | 89,450 |
| 2 | Peak 2 | 27,02 | 1405115,501  | 10,550 |

Total Area of Peak = 13318067.50

n-Hexane/ 2-Propanol = 95:05, flow rate 0.5 ml/ min,  $\lambda = 210$  nm (Daicel Chiralpak OD column)

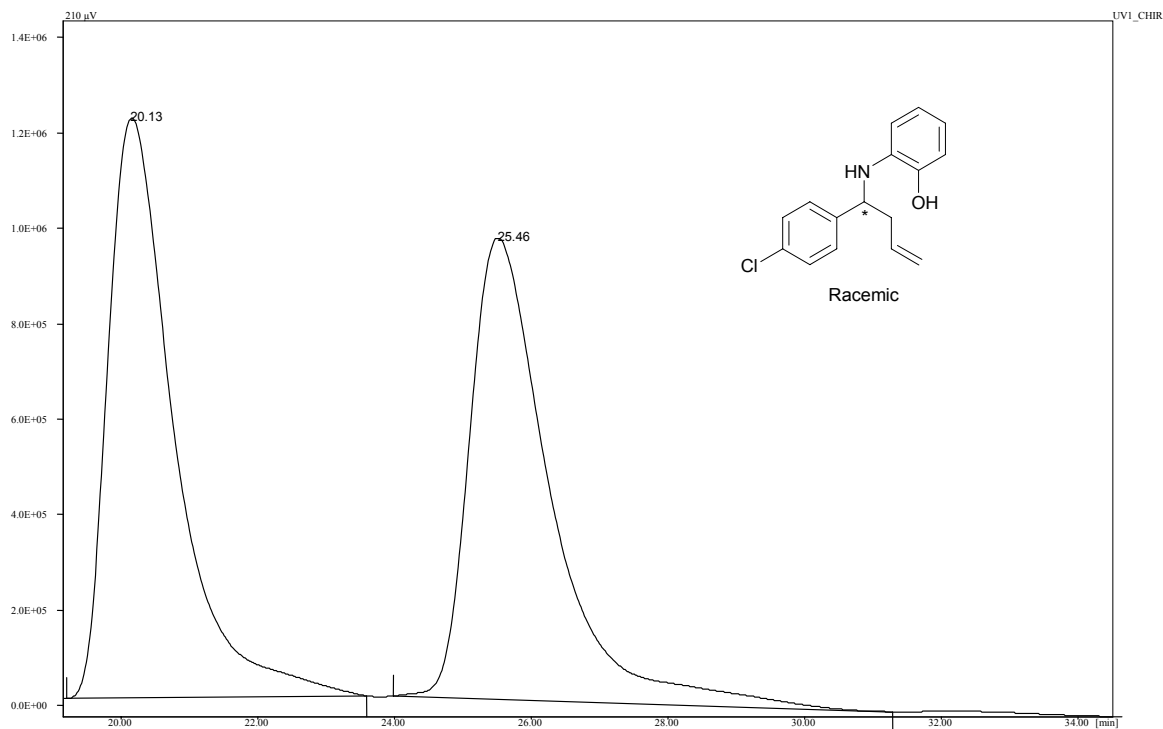

File name : SJ414001  
Control Method :95\_05\_05

| # | Name   | Rt    | Area         | %Area  |
|---|--------|-------|--------------|--------|
| 1 | Peak 1 | 20,13 | 80021344,000 | 50,627 |
| 2 | Peak 2 | 25,46 | 78037798,500 | 49,373 |

Total Area of Peak = 158059142.50



n-Hexane/ 2-Propanol = 95:05, flow rate 0.5 ml/ min,  $\lambda = 210$  nm(Daicel Chiralpak OD column)

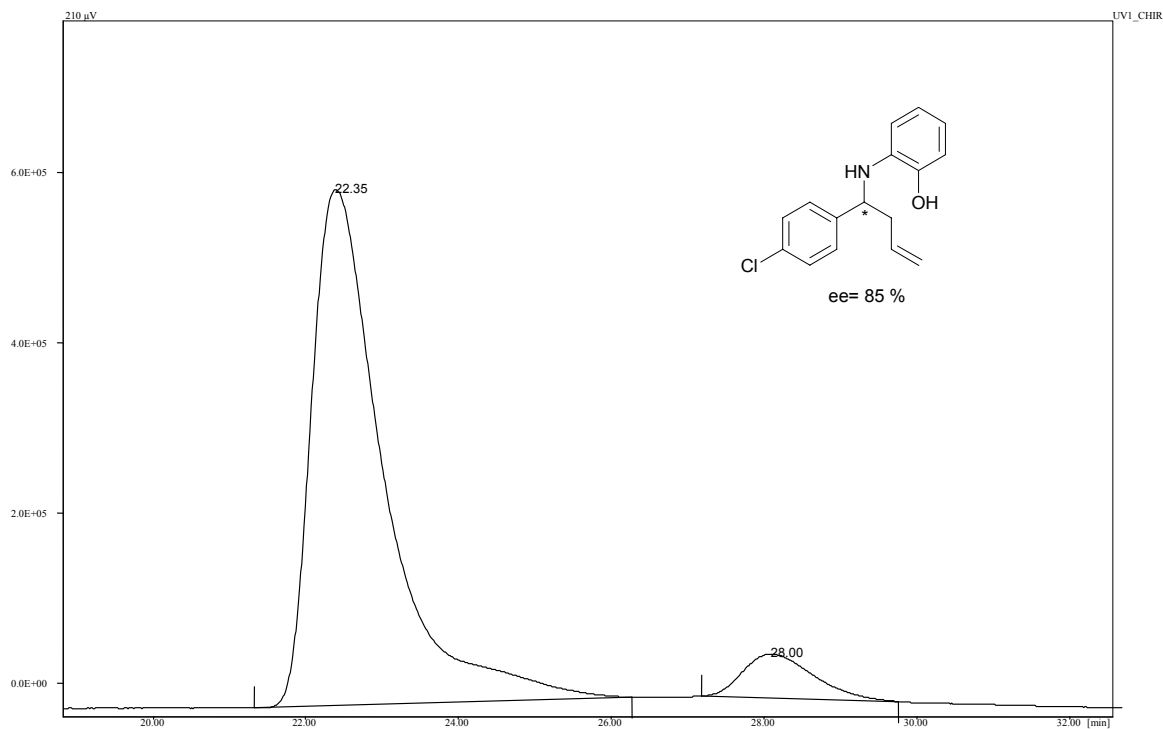

File name : SJ413001  
Control Method :95\_05\_05

| # | Name   | Rt    | Area         | %Area  |
|---|--------|-------|--------------|--------|
| 1 | Peak 1 | 22,35 | 39293195,750 | 92,330 |
| 2 | Peak 2 | 28,00 | 3264158,250  | 7,670  |

Total Area of Peak = 42557354.00

n-Hexane/ 2-Propanol = 90:10, flow rate 1 ml/ min,  $\lambda = 210$  nm (Daicel Chiralpak AD column)

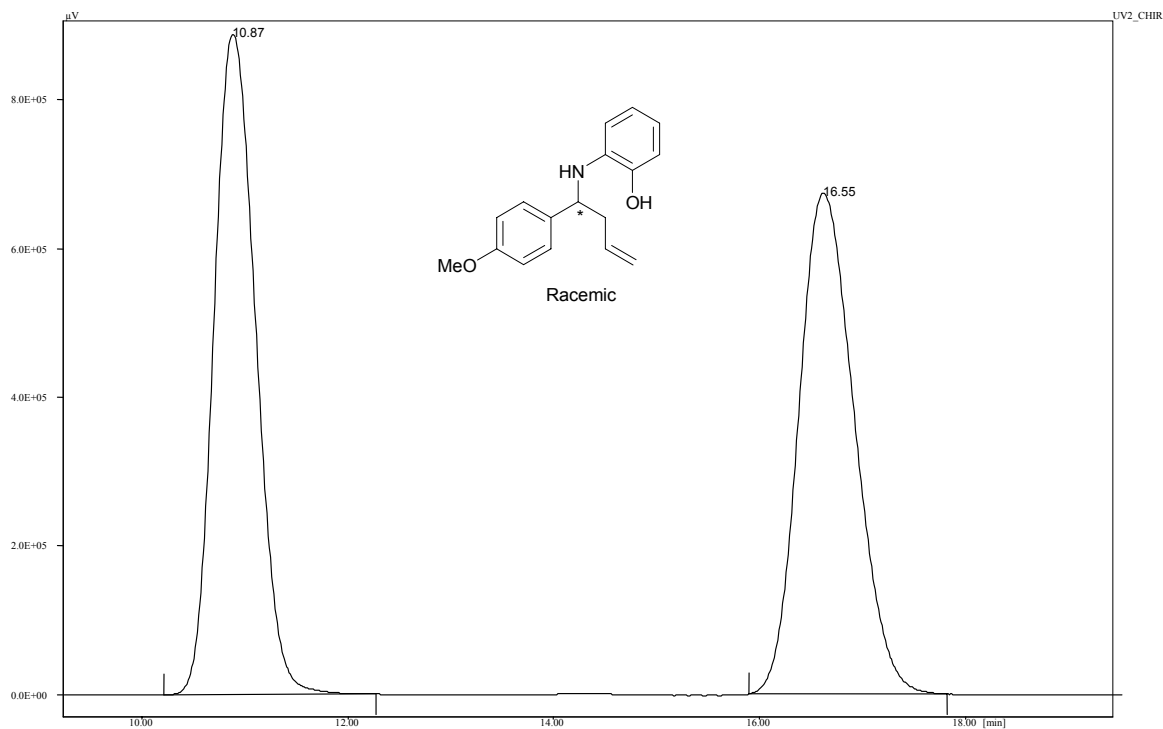

File name : CB050001  
Control Method :90-10-1M

| # | Name   | Rt    | Area        | %Area |
|---|--------|-------|-------------|-------|
| 1 | Peak 1 | 10,87 | 24272635,75 | 49,66 |
| 2 | Peak 2 | 16,55 | 24607561,50 | 50,34 |

Total Area of Peak = 48880197.25

n-Hexane/ 2-Propanol = 90:10, flow rate 1 ml/ min,  $\lambda = 210$  nm (Daicel Chiralpak AD column)

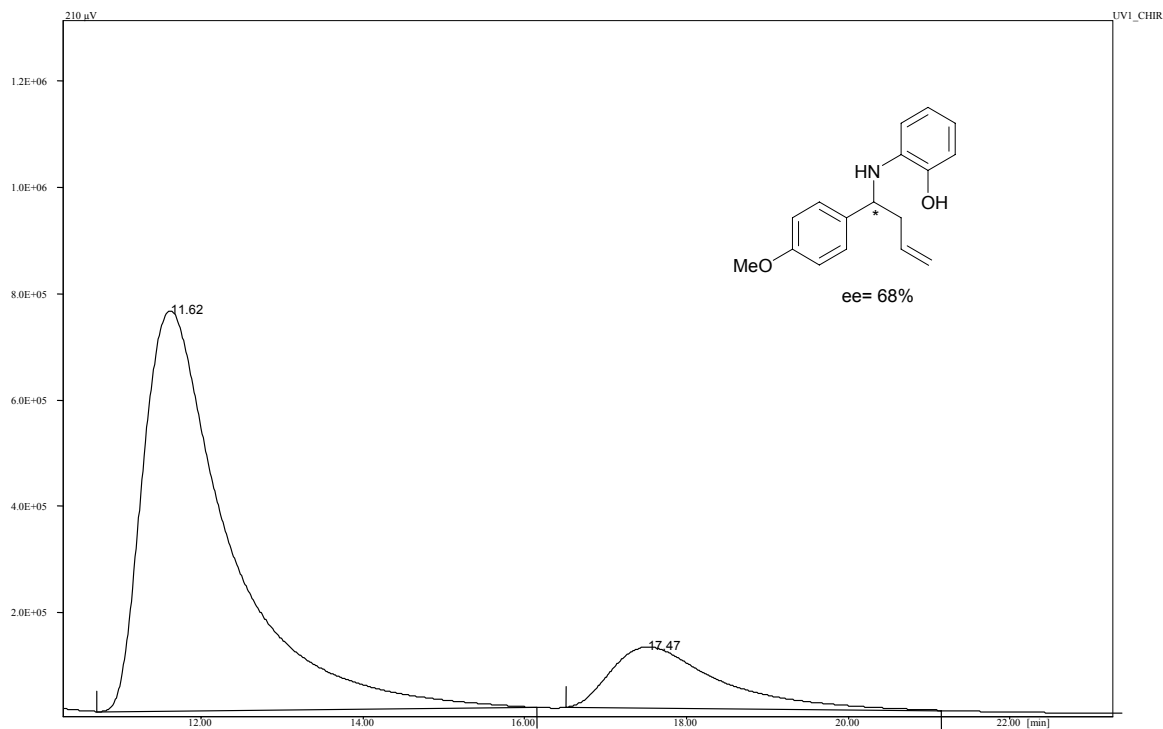

File name : SJ405002  
Control Method :90-10-1M

| # | Name   | Rt    | Area         | %Area  |
|---|--------|-------|--------------|--------|
| 1 | Peak 1 | 11,62 | 55039797,250 | 84,014 |
| 2 | Peak 2 | 17,47 | 10472482,001 | 15,986 |

Total Area of Peak = 65512279.25

n-Hexane/ 2-Propanol = 95:05, flow rate 0.5 ml/ min,  $\lambda = 210$  nm (Daicel Chiralpak OD column)

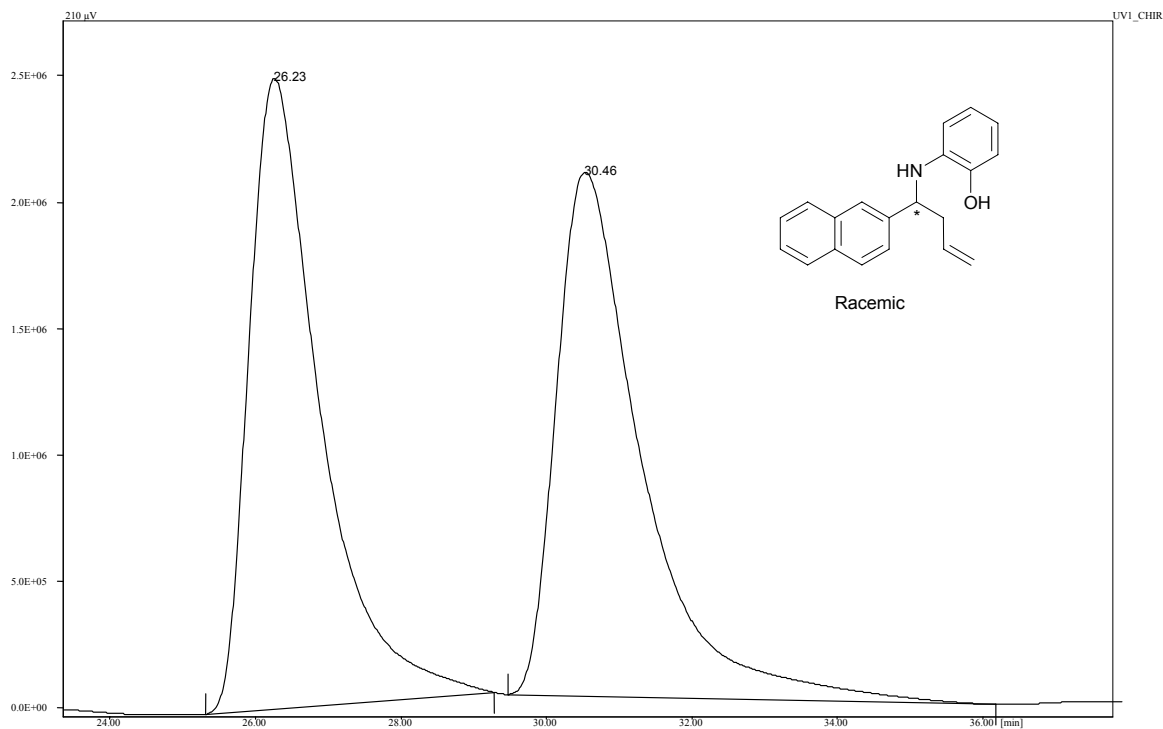

File name : S407C008  
Control Method :95\_05\_05

| # | Name   | Rt    | Area          | %Area  |
|---|--------|-------|---------------|--------|
| 1 | Peak 1 | 26,23 | 166152150,750 | 50,014 |
| 2 | Peak 2 | 30,46 | 166057582,750 | 49,986 |

Total Area of Peak = 332209733.50

n-Hexane/ 2-Propanol = 95:05, flow rate 0.5 ml/ min,  $\lambda = 210$  nm (Daicel Chiralpak OD column)

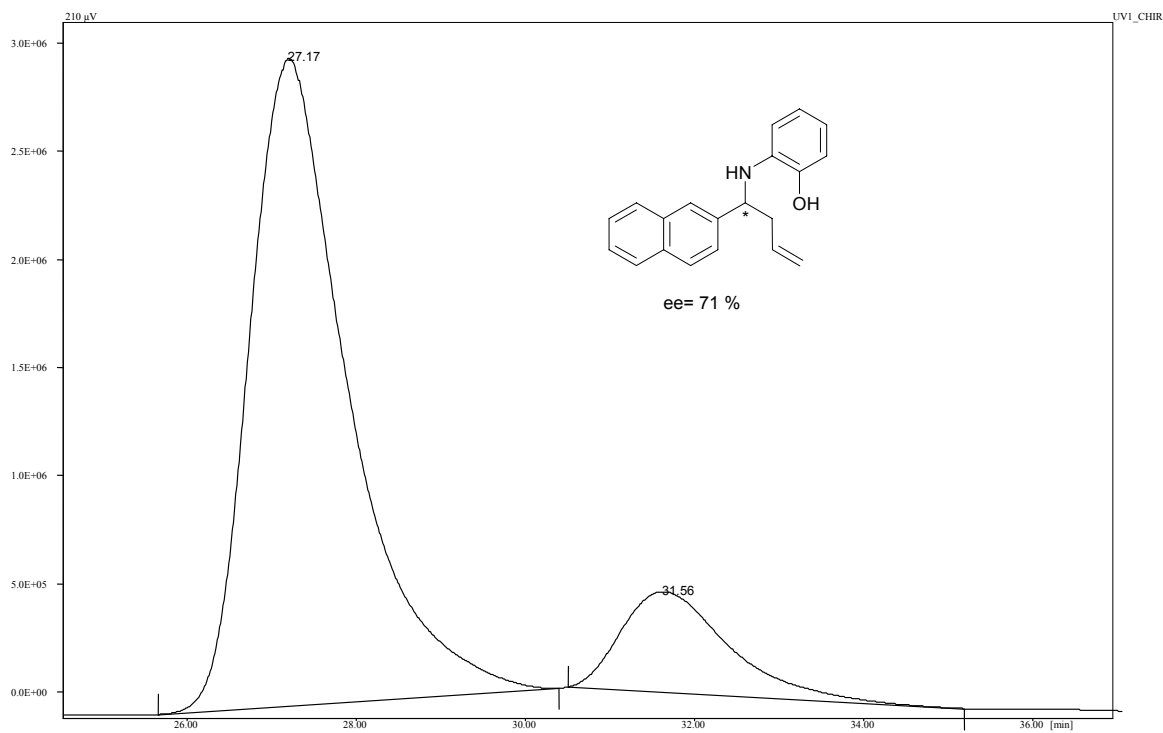

File name : SJ402004  
Control Method :95\_05\_05

| # | Name   | Rt    | Area          | %Area  |
|---|--------|-------|---------------|--------|
| 1 | Peak 1 | 27,17 | 238321094,500 | 85,546 |
| 2 | Peak 2 | 31,56 | 40266230,000  | 14,454 |

Total Area of Peak = 278587324.50

n-Hexane/ 2-Propanol = 90:10, flow rate 1 ml/ min,  $\lambda$  = 210 nm (Daicel Chiralpak AD column)

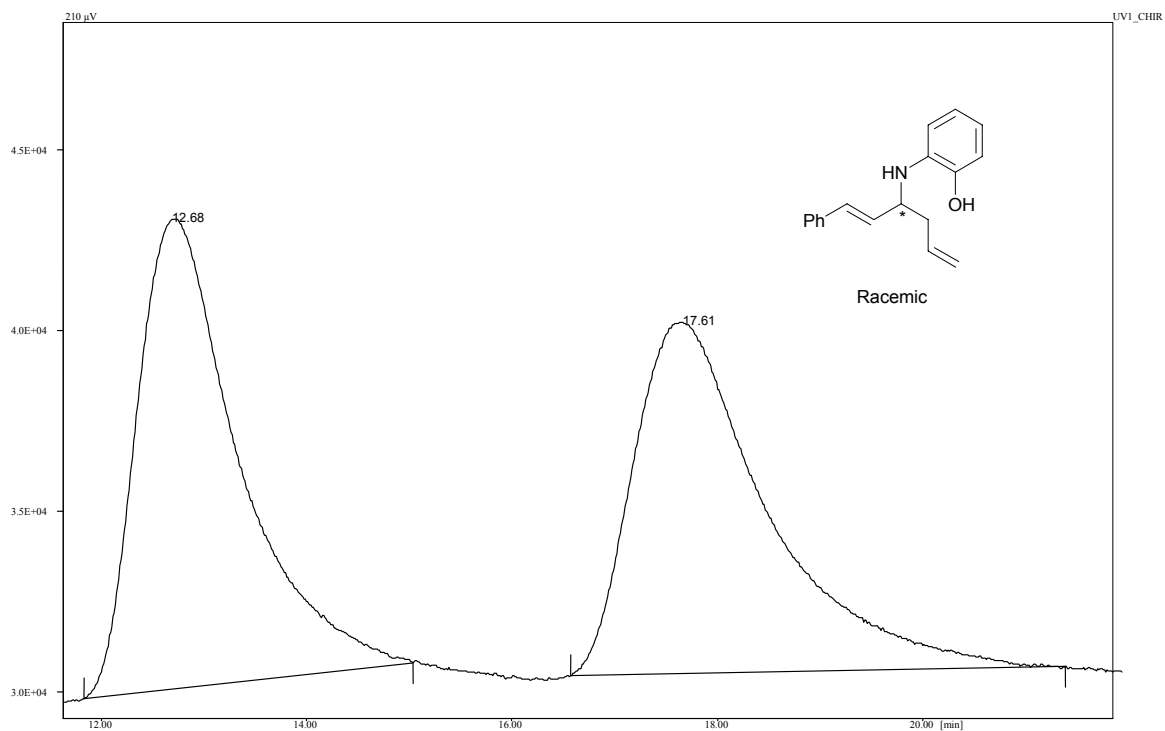

File name : S407A001  
Control Method : 90-10-1M

| # | Name   | Rt    | Area       | %Area  |
|---|--------|-------|------------|--------|
| 1 | Peak 1 | 12,68 | 881668,000 | 50,416 |
| 2 | Peak 2 | 17,61 | 867119,500 | 49,584 |

Total Area of Peak = 1748787.50

n-Hexane/ 2-Propanol = 90:10, flow rate 1 ml/ min,  $\lambda = 210$  nm (Daicel Chiralpak AD column)

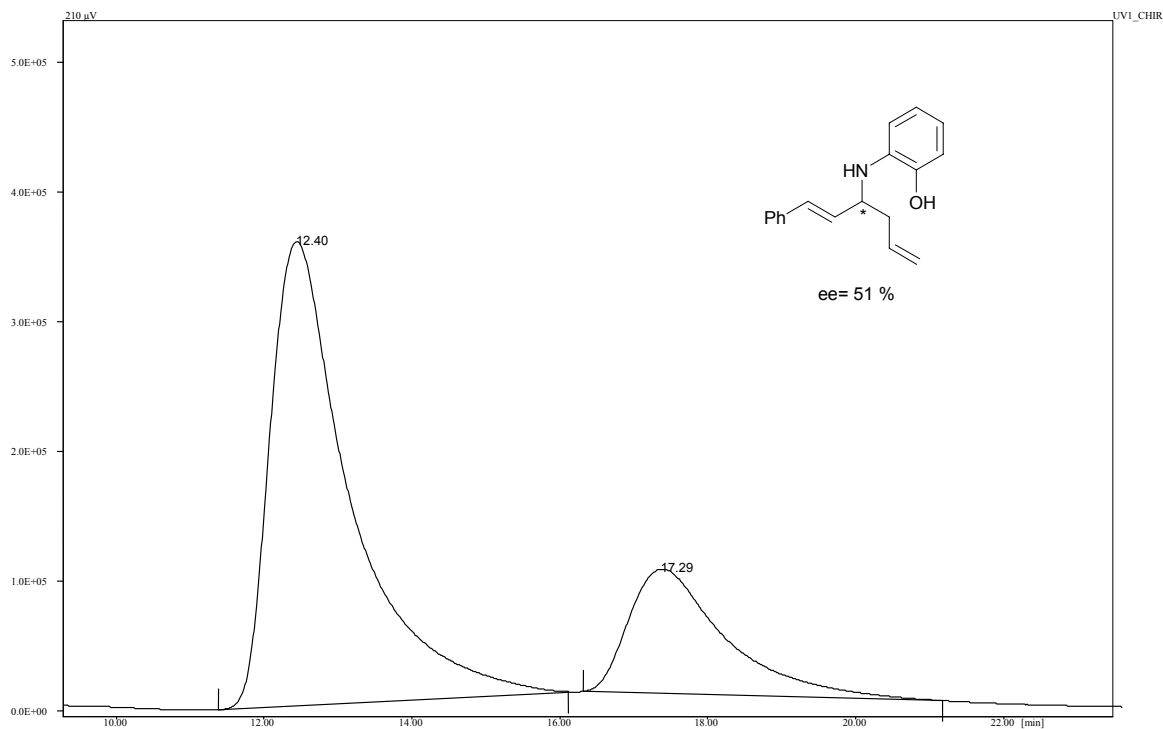

File name : SJ403001  
Control Method :90-10-1M

| # | Name   | Rt    | Area         | %Area  |
|---|--------|-------|--------------|--------|
| 1 | Peak 1 | 12,40 | 26626444,000 | 75,712 |
| 2 | Peak 2 | 17,29 | 8541809,250  | 24,288 |

Total Area of Peak = 35168253.25

n-Hexane/ 2-Propanol = 90:10, flow rate 1 ml/ min,  $\lambda = 210$  nm (Daicel Chiralpak OD column)

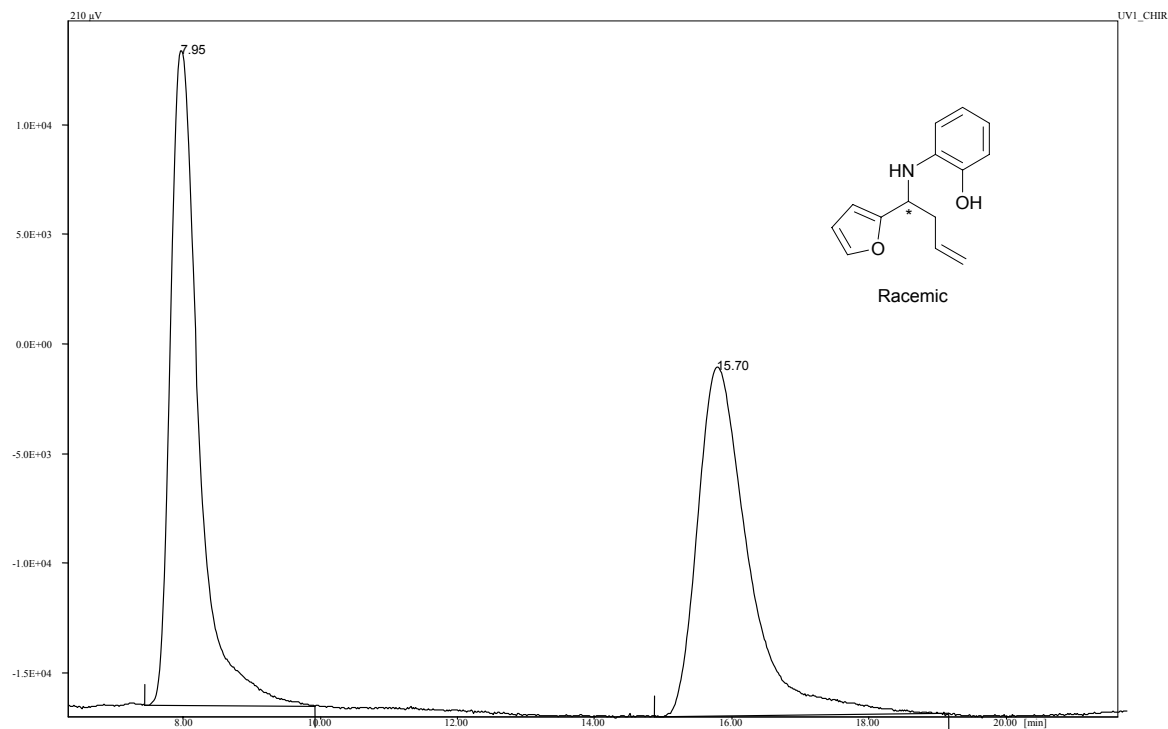

File name : S407D001  
Control Method :90-10-1M

| # | Name   | Rt    | Area       | %Area  |
|---|--------|-------|------------|--------|
| 1 | Peak 1 | 7,95  | 828735,500 | 50,580 |
| 2 | Peak 2 | 15,70 | 809725,500 | 49,420 |

Total Area of Peak = 1638461.00



n-Hexane/ 2-Propanol = 90:10, flow rate 1 ml/ min,  $\lambda = 210$  nm (Daicel Chiralpak OD column)

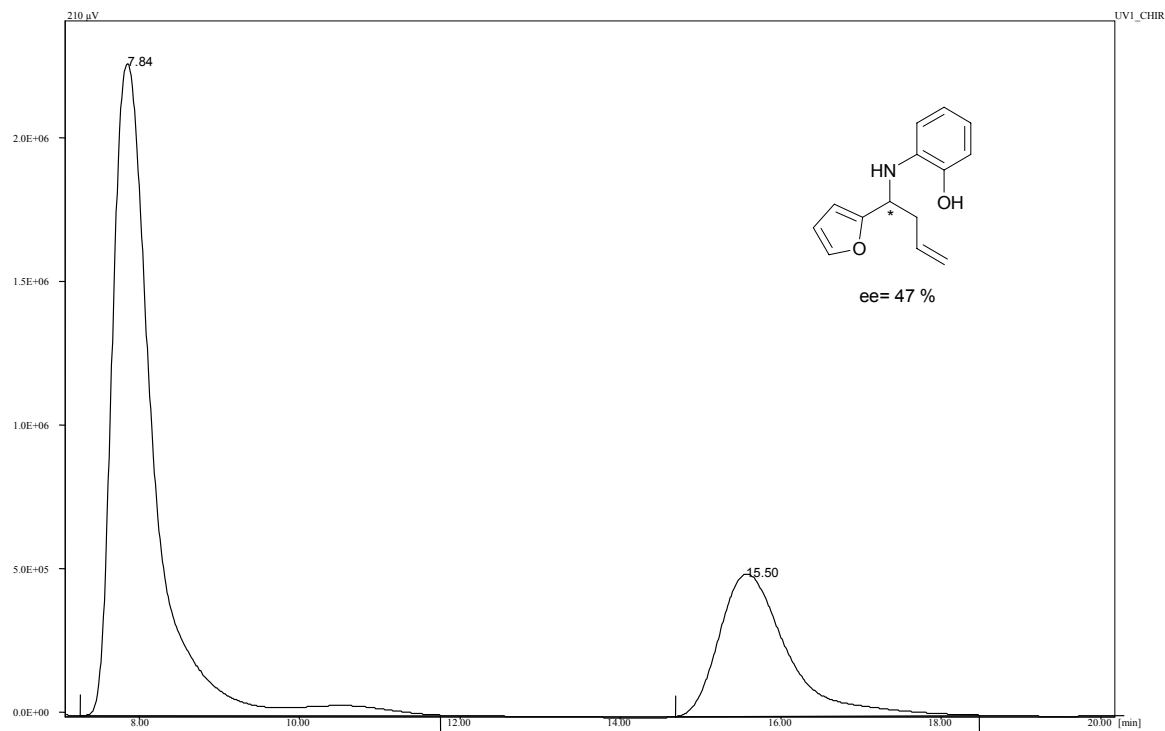

File name : SJ412003  
Control Method :90-10-1M

| # | Name   | Rt    | Area         | %Area  |
|---|--------|-------|--------------|--------|
| 1 | Peak 1 | 7,84  | 78129487,000 | 73,271 |
| 2 | Peak 2 | 15,50 | 28502058,000 | 26,729 |

Total Area of Peak = 106631545.00
